# Supplementary material for: Crossover interference and sex-specific genetic maps shape identical by descent sharing in close relatives
Source: PLoS Genet. 2019 Dec 20;15(12):e1007979. doi: 10.1371/journal.pgen.1007979 (PMC6944377; doi:10.1371/journal.pgen.1007979)
Supplement: S1 Dataset — (XLSX) [file pgen.1007979.s017.xlsx]

## Sheet: Index
Sheet name	Description of contents	Figures that include data
IBD proportions	Summary statistics, including standard deviations, quartiles, and mean	Fig 1, S2, S3
Full sib SD SE distance calc	Number of standard errors that separate real and simulated full sibling standard deviation values	Quoted in main text
Differences in simulated SD	Summary statistics from simulation models and SAMAFS-validated, and calculations of the differences between the models	Quoted in main text
Simulated 3rd-6th cousins	For the four simulation models, numbers of relatives that have non-zero IBD sharing	Fig 3, S10
Admix rate estimates	Mean and standard deviations of admixture rate estimates and differences between simulation models	Quoted in main text
Relatedness inference	Rates that simulated and real SAMAFS pairs are inferred as their true degree of relatedness using KING-based kinship cutoffs	S9 Fig
SAMAFS Full sib IBD frac	Estimated IBD sharing fraction from SAMAFS full sibling pairs	S5, S6, S7 Fig, and used to calculate summary statistics
SAMAFS First cousin IBD frac	Estimated IBD sharing fraction from SAMAFS first cousins	Used to calculate summary statistics
SAMAFS First cous 1R IBD frac	Estimated IBD sharing fraction from SAMAFS first cousins once removed	Used to calculate summary statistics
SAMAFS Second cousin IBD frac	Estimated IBD sharing fraction from SAMAFS second cousins	Used to calculate summary statistics
SAMAFS Half-sib seg numbers	Number of IBD segments detected between SAMAFS half-sibling pairs	S11B Fig
SAMAFS Full sib seg merge	Total length and number of short (< 10 informative SNP) segments identified by HAPI and merged with the previous segment (see Methods)	S16 Fig

## Sheet: IBD proportions
SS+intf	n = 10000	Full sibling	Full siblings IBD2	First cousin	First cousin once removed	Second Cousin		SA+intf	n = 10000	Full sibling	Full siblings IBD2	First cousin	First cousin once removed	Second Cousin
	SIMULATION: MEAN	0.499385	0.249275	0.124867	0.0622547	0.0314046			SIMULATION: MEAN	0.500084	0.250085	0.124881	0.062808	0.0311892
	SIMULATION: MEAN bootstrap	0.000366441	0.000412538	0.000203025	0.000159229	0.000113003			SIMULATION: MEAN bootstrap	0.000351517	0.000397669	0.000193671	0.000149656	0.000109027
	SIMULATION: Q 0	0.357951	0.0670987	0.0559176	0.0158	0.00232195			SIMULATION: Q 0	0.333325	0.0979834	0.0515111	0.0142993	0.00331588
	SIMULATION: Q 0 bootstrap	0.00667057	0.0281411	0.000839552	0.000571575	0.000785162			SIMULATION: Q 0 bootstrap	0.00977403	0.00588875	0.00251465	0.00193572	0.000320965
	SIMULATION: Q 25	0.474237	0.220964	0.110843	0.0511636	0.0233653			SIMULATION: Q 25	0.477126	0.222481	0.111433	0.0524332	0.0235644
	SIMULATION: Q 25 bootstrap	0.00045447	0.000626386	0.000232284	0.000205443	0.00014292			SIMULATION: Q 25 bootstrap	0.000429876	0.000564368	0.000218316	0.00018541	0.000143829
	SIMULATION: Q 50	0.498971	0.248136	0.124579	0.0613081	0.0306016			SIMULATION: Q 50	0.499912	0.249437	0.124514	0.0622427	0.0303695
	SIMULATION: Q 50 bootstrap	0.000458863	0.000419487	0.00026024	0.0002263	0.000143459			SIMULATION: Q 50 bootstrap	0.00042457	0.000495079	0.000219759	0.000160244	0.000145368
	SIMULATION: Q 75	0.524919	0.277282	0.137939	0.0725543	0.0383856			SIMULATION: Q 75	0.523883	0.276525	0.137666	0.0726419	0.0380299
	SIMULATION: Q 75 bootstrap	0.000589917	0.000653512	0.000314467	0.000252198	0.000170855			SIMULATION: Q 75 bootstrap	0.000528234	0.000609584	0.000236646	0.000245125	0.00014183
	SIMULATION: Q 100	0.629052	0.40025	0.198881	0.144803	0.0810272			SIMULATION: Q 100	0.624499	0.403592	0.204382	0.133687	0.0821235
	SIMULATION: Q 100 bootstrap	0.00205119	0.00327173	0.00164721	0.00879797	0.00191439			SIMULATION: Q 100 bootstrap	0.00264207	0.00448927	0.00502371	0.00473169	0.00205825
	SIMULATION: SD	0.0370117	0.0414443	0.0201874	0.015925	0.0112266			SIMULATION: SD	0.0350276	0.0398729	0.0196596	0.0150891	0.010698
	SIMULATION: SD bootstrap	0.000259169	0.000294152	0.00014174	0.000117	8.3e-05			SIMULATION: SD bootstrap	0.000248909	0.000282114	0.000139304	0.000108	8.11e-05
	Q 25 STDERR DIFFERENCE TO SAMAFS Validated mean adjusted			0.224872	0.599983	0.686589			Q 25 STDERR DIFFERENCE TO SAMAFS Validated mean adjusted			1.39926	3.77184	1.14147
	Q 75 STDERR DIFFERENCE TO SAMAFS Validated mean adjusted			0.204736	-0.77037	0.414742			Q 75 STDERR DIFFERENCE TO SAMAFS Validated mean adjusted			-0.270322	-0.595997	-0.146596
SS+Poiss	n = 10000	Full sibling	Full siblings IBD2	First cousins	First cousins once removed	Second cousins		SA+Poiss	n = 10000	Full sibling	Full siblings IBD2	First cousins	First cousins once removed	Second cousins
	SIMULATION: MEAN	0.50054	0.250865	0.124979	0.0627899	0.0311606			SIMULATION: MEAN	0.500334	0.250482	0.125238	0.0624524	0.0312078
	SIMULATION: MEAN bootstrap	0.000414818	0.000456587	0.000226479	0.000174007	0.000126003			SIMULATION: MEAN bootstrap	0.00039335	0.000442216	0.000217314	0.000170201	0.000121493
	SIMULATION: Q 0	0.339578	0.0943281	0.0499188	0.00915912	0.00212445			SIMULATION: Q 0	0.344776	0.114892	0.0507881	0.0146017	0.00105755
	SIMULATION: Q 0 bootstrap	0.00647681	0.00522486	0.00218998	0.00167284	0.000107931			SIMULATION: Q 0 bootstrap	0.00496708	0.00159879	0.00250357	0.000703763	0.000518186
	SIMULATION: Q 25	0.47241	0.218813	0.109465	0.0505176	0.0220576			SIMULATION: Q 25	0.473835	0.2201	0.110413	0.0504873	0.0224505
	SIMULATION: Q 25 bootstrap	0.000509364	0.0006583	0.000365961	0.000191943	0.000144002			SIMULATION: Q 25 bootstrap	0.000498518	0.000603768	0.000287493	0.00017126	0.000123727
	SIMULATION: Q 50	0.500191	0.249459	0.124698	0.0620214	0.0300079			SIMULATION: Q 50	0.500349	0.249167	0.124565	0.0613398	0.0301031
	SIMULATION: Q 50 bootstrap	0.000548476	0.000645111	0.000288077	0.000215039	0.000154297			SIMULATION: Q 50 bootstrap	0.000485993	0.00054246	0.000246912	0.000196846	0.000178489
	SIMULATION: Q 75	0.527985	0.280892	0.139633	0.0740232	0.0389528			SIMULATION: Q 75	0.526841	0.280028	0.139699	0.0730926	0.0387462
	SIMULATION: Q 75 bootstrap	0.000547639	0.000647658	0.000324443	0.000223063	0.000204583			SIMULATION: Q 75 bootstrap	0.000548115	0.000595286	0.000272181	0.000223621	0.000176416
	SIMULATION: Q 100	0.643137	0.435485	0.209631	0.134888	0.0972505			SIMULATION: Q 100	0.644671	0.431906	0.211134	0.143529	0.0921576
	SIMULATION: Q 100 bootstrap	0.00278246	0.010235	0.0027326	0.00132289	0.00387689			SIMULATION: Q 100 bootstrap	0.00396676	0.0107559	0.00236187	0.00233719	0.00303089
	SIMULATION: SD	0.041319	0.0462479	0.0226134	0.0173726	0.0125311			SIMULATION: SD	0.0394789	0.0445985	0.0217087	0.0170162	0.0121037
	SIMULATION: SD bootstrap	0.000287997	0.000328522	0.000156493	0.000126205	0.000101			SIMULATION: SD bootstrap	0.00027896	0.000317488	0.000155	0.000125002	9.59e-05
	Q 25 STDERR DIFFERENCE TO SAMAFS Validated mean adjusted			-2.1684	-0.984662	-2.30466			Q 25 STDERR DIFFERENCE TO SAMAFS Validated mean adjusted			-0.588597	-1.08469	-1.42663
	Q 75 STDERR DIFFERENCE TO SAMAFS Validated mean adjusted			3.02316	2.29683	1.28708			Q 75 STDERR DIFFERENCE TO SAMAFS Validated mean adjusted			3.27644	0.338737	0.979716
SAMAFS: Original		Full sibling	Full siblings IBD2	First cousins	First cousins once removed	Second cousins		SAMAFS: Validated		Full sibling	Full siblings IBD2	First cousins	First cousins once removed	Second cousins
	n=	1128	1128	5384	6342	2584			n=	NA	NA	3722	2869	906
	MEAN	0.500556	0.25012	0.126687	0.0625257	0.0338842			MEAN	NA	NA	0.127919	0.064876	0.0322692
	MEAN bootstrap	0.00111595	0.00123418	0.00031419	0.000169368	0.00021953			MEAN bootstrap	NA	NA	0.000346225	0.000306603	0.000381615
	Q 0	0.392099	0.12976	0.00023549	0.011202	0.00497776			Q 0	NA	NA	0.065775	0.0185212	0.00722975
	Q 0 bootstrap	0.00218828	0.00449724	8.585e-05	0.00091704	0.00123811			Q 0 bootstrap	NA	NA	0.00184018	0.00149813	0.000720353
	Q 25	0.475138	0.21883	0.11241	0.0509194	0.0257582			Q 25	NA	NA	0.113648	0.0532926	0.0240845
	Q 25 bootstrap	0.0015201	0.00138678	0.0003846	0.000193837	0.00033044			Q 25 bootstrap	NA	NA	0.000453607	0.000356791	0.000412846
	Q 50	0.500822	0.248711	0.126464	0.0614485	0.0328114			Q 50	NA	NA	0.127212	0.0636025	0.0310947
	Q 50 bootstrap	0.0013892	0.00164644	0.00038664	0.00020326	0.00025115			Q 50 bootstrap	NA	NA	0.00036633	0.000390345	0.000565682
	Q 75	0.525083	0.277524	0.140411	0.0731572	0.0406615			Q 75	NA	NA	0.140736	0.0753076	0.0391411
	Q 75 bootstrap	0.00134599	0.00116509	0.00039242	0.000211166	0.0003275			Q 75 bootstrap	NA	NA	0.000505581	0.000419704	0.00061218
	Q 100	0.612923	0.402612	0.256394	0.147446	0.0853728			Q 100	NA	NA	0.256394	0.136577	0.081743
	Q 100 bootstrap	0.00485967	0.0121651	0.00483741	0.00413255	0.00242524			Q 100 bootstrap	NA	NA	0.00477501	0.00345683	0.00172377
	SD	0.0376344	0.0427462	0.0231062	0.0171209	0.0112966			SD	NA	NA	0.0209504	0.0165554	0.0114275
	SD bootstrap	0.00077279	0.000909975	0.00035203	0.000130522	0.00017647			SD bootstrap	NA	NA	0.000325574	0.000244898	0.000325076
SAMAFS: Mean adjusted		Full sibling	Full siblings IBD2	First cousins	First cousins once removed	Second cousins		SAMAFS: Validated mean adjusted		Full sibling	Full siblings IBD2	First cousins	First cousins once removed	Second cousins
	adj	NA	NA	-0.0016869	-2.572e-05	-0.00263421			adj	NA	NA	-0.0029188	-0.002376	-0.00101915
	Mean	NA	NA	0.125	0.0625	0.03125			Mean	NA	NA	0.125	0.0625	0.03125
	Q0	NA	NA	-0.00145141	0.0111762	0.00234355			Q0	NA	NA	0.0628562	0.0161452	0.0062106
	Q25	NA	NA	0.110723	0.0508937	0.023124			Q25	NA	NA	0.110729	0.0509166	0.0230653
	Q50	NA	NA	0.124777	0.0614227	0.0301772			Q50	NA	NA	0.124293	0.0612265	0.0300755
	Q75	NA	NA	0.138725	0.0731315	0.0380273			Q75	NA	NA	0.137817	0.0729315	0.038122
	Q100	NA	NA	0.254707	0.0170951	0.0827386			Q100	NA	NA	0.253476	0.134201	0.0807239
	cM length subtracted to match expectations			-11.2897	-0.172134	-17.6297						-19.5344	-15.9016	-6.82076
Hemani20K		Full sibling	Full siblings IBD2
	n=	20240	20240
	MEAN	0.501587	0.251396
	MEAN bootstrap	0.000256059	0.000289169
	Q 0	0.355756	0.103941
	Q 0 bootstrap	0.00248379	0.00285549
	Q 25	0.477368	0.223428
	Q 25 bootstrap	0.000333103	0.000372338
	Q 50	0.501521	0.25055
	Q 50 bootstrap	0.000355506	0.000353374
	Q 75	0.526289	0.278269
	Q 75 bootstrap	0.00037736	0.000374838
	Q 100	0.646021	0.439328
	Q 100 bootstrap	0.00144887	0.00460305
	SD	0.036567	0.0410736
	SD bootstrap	0.000183356	0.000208132

## Sheet: Full sib SD SE distance calc
						IBD		IBD2
SS+intf						SAMAFS	HEMANI20K	SAMAFS	HEMANI20K
FS IBD	Bootstrap	FS IBD2	Bootstrap		SS+intf # SE distance	-0.763939	1.02895	-1.36131	1.02895
0.0370117	0.000259169	0.0414443	0.000294152
SA+intf						SAMAFS	HEMANI20K	SAMAFS	HEMANI20K
FS IBD	Bootstrap	FS IBD2	Bootstrap		SA+intf # SE distance	-3.21083	-3.42494	-3.01601	-3.42494
0.0350276	0.000248909	0.0398729	0.000282114
SS+Poiss						SAMAFS	HEMANI20K	SAMAFS	HEMANI20K
FS IBD	Bootstrap	FS IBD2	Bootstrap		SS+Poiss # SE distance	4.46776	13.3049	3.61946	13.3049
0.041319	0.000287997	0.0462479	0.000328522
SA+Poiss						SAMAFS	HEMANI20K	SAMAFS	HEMANI20K
FS IBD	Bootstrap	FS IBD2	Bootstrap		SA+Poiss # SE distance	2.245	9.28512	1.92188	9.28512
0.0394789	0.00027896	0.0445985	0.000317488
SAMAFS
FS IBD	Bootstrap	FS IBD2	Bootstrap
0.0376344	0.00077279	0.0427462	0.000909975
Hemani20K
FS IBD	Bootstrap	FS IBD2	Bootstrap
0.036567	0.000183356	0.0410736	0.000208132

## Sheet: Differences in simulated SD
SS+intf		Q 0	Q 25	Q 50	Q 75	Q 100	SD	Q 25- Q 75 range		SD difference - models	Comparison	Constant	Full siblings	First cousins	First cousins once removed	Second cousins	AVG
	Full siblings	0.357951	0.474237	0.498971	0.524919	0.629052	0.0370117	0.0506826			SS vs SA	Intf	0.0566453	0.0268475	0.055395	0.0494073	0.0470738
	First cousins	0.0559176	0.110843	0.124579	0.137939	0.198881	0.0201874	0.0270957			SS vs SA	Poiss	0.0466102	0.0416735	0.0209454	0.0353081	0.0361343
	First cousins once removed	0.0158	0.0511636	0.0613081	0.0725543	0.144803	0.015925	0.0213907			AVG		0.0516278	0.0342605	0.0381702	0.0423577	0.041604
	Second cousins	0.00232195	0.0233653	0.0306016	0.0383856	0.0810272	0.0112266	0.0150203			Intf vs Poiss	SS	0.104245	0.107283	0.0833284	0.104103	0.0997396
											Intf vs Poiss	SA	0.112752	0.0943933	0.11325	0.116139	0.109134
SS+Poiss		Q 0	Q 25	Q 50	Q 75	Q 100	SD	Q 25- Q 75 range			AVG		0.108498	0.100838	0.0982891	0.110121	0.104437
	Full siblings	0.339578	0.47241	0.500191	0.527985	0.643137	0.041319	0.0555756			SS vs SA	Intf	0.0839575	0.0328821	0.0584932	0.0383526	0.0534213
	First cousins	0.0499188	0.109465	0.124698	0.139633	0.209631	0.0226134	0.0301683		Q 25 - Q 75 difference - models	SS vs SA	Poiss	0.0484854	0.0301341	0.0398242	0.0367839	0.0388069
	First cousins once removed	0.00915912	0.0505176	0.0620214	0.0740232	0.134888	0.0173726	0.0235056			AVG		0.0662215	0.0315081	0.0491587	0.0375683	0.0461141
	Second cousins	0.00212445	0.0220576	0.0300079	0.0389528	0.0972505	0.0125311	0.0168951			Intf vs Poiss	SS	0.0880422	0.101849	0.0899718	0.110968	0.0977076
											Intf vs Poiss	SA	0.117886	0.104238	0.106022	0.112311	0.110114
SA+intf		Q 0	Q 25	Q 50	Q 75	Q 100	SD	Q 25- Q 75 range			AVG		0.102964	0.103043	0.0979971	0.111639	0.103911
	Full siblings	0.333325	0.477126	0.499912	0.523883	0.624499	0.0350276	0.046757
	First cousins	0.0515111	0.111433	0.124514	0.137666	0.204382	0.0196596	0.0262331
	First cousins once removed	0.0142993	0.0524332	0.0622427	0.0726419	0.133687	0.0150891	0.0202087
	Second cousins	0.00331588	0.0235644	0.0303695	0.0380299	0.0821235	0.010698	0.0144655
SA+Poiss		Q 0	Q 25	Q 50	Q 75	Q 100	SD	Q 25- Q 75 range
	Full siblings	0.344776	0.473835	0.500349	0.526841	0.644671	0.0394789	0.0530056
	First cousins	0.0507881	0.110413	0.124565	0.139699	0.211134	0.0217087	0.0292858
	First cousins once removed	0.0146017	0.0504873	0.0613398	0.0730926	0.143529	0.0170162	0.0226053
	Second cousins	0.00105755	0.0224505	0.0301031	0.0387462	0.0921576	0.0121037	0.0162957
		Q 0	Q 25	Q 50	Q 75	Q 100	SD	Q 25- Q 75 range
SAMAFS: Validated (mean adjusted FC, FC1R, SC)	Full siblings	0.392099	0.476003	0.501458	0.525895	0.612923	0.0376125	0.0498915
	First cousins	0.0628562	0.110729	0.124293	0.137817	0.253476	0.0209504	0.0270884
	First cousins once removed	0.0161452	0.0509166	0.0612265	0.0729315	0.134201	0.0165554	0.022015
	Second cousins	0.0062106	0.0230653	0.0300755	0.038122	0.0807239	0.0114275	0.0150567
															.

## Sheet: Simulated 3rd-6th cousins
				Genomic fraction IBD (segments > 0)							Number of Segments shared (segments > 0)
3rd cousins	Model	Simulated pairs	Pairs with retained IBD	Mean	Q 0	Q 25	Q 50	Q 75	Q 100	SD	Mean	Q 0	Q 25	Q 50	Q 75	Q 100	SD
	SS+intf	10000	9850	0.00803079	3.80211e-06	0.0041531	0.00724032	0.0109796	0.0342911	0.00513028	4.63807	1	3	4	6	14	2.23138
	SA+intf	10000	9752	0.00796999	9.8721e-07	0.00375199	0.00692716	0.0110141	0.0412785	0.00556149	4.61916	1	3	4	6	17	2.42896
	SS+Poiss	10000	9741	0.00802432	1.93946e-07	0.0038822	0.00702894	0.0110608	0.0388088	0.00551202	4.65845	1	3	4	6	16	2.42964
	SA+Poiss	10000	9779	0.00806511	5.43496e-06	0.00378738	0.00705948	0.0111742	0.0421698	0.00555507	4.65753	1	3	4	6	17	2.40827
	Female	10000	9936	0.00792881	8.98619e-06	0.00452158	0.00730635	0.0106365	0.0319172	0.00461845	5.26223	1	4	5	7	18	2.34552
	Male	10000	9697	0.00806715	2.03135e-06	0.00366416	0.00694346	0.011283	0.0401411	0.00574561	3.9406	1	2	4	5	15	1.99602
4th cousins	Model	Simulated pairs	Pairs with retained IBD	Mean	Q 0	Q 25	Q 50	Q 75	Q 100	SD	Mean	Q 0	Q 25	Q 50	Q 75	Q 100	SD
	SS+intf	10000	7273	0.00265109	1.03846e-07	0.000905163	0.00204149	0.00374839	0.0173929	0.00231812	1.88877	1	1	2	2	9	1.07265
	SA+intf	10000	7361	0.00265286	2.30718e-06	0.000938259	0.00207275	0.00377541	0.0167923	0.00226571	1.90708	1	1	2	2	9	1.05594
	SS+Poiss	10000	6898	0.00282728	1.03547e-07	0.000889278	0.00208649	0.00396351	0.0200962	0.0026323	2.01957	1	1	2	3	10	1.22562
	SA+Poiss	10000	6955	0.00280918	2.52518e-08	0.00088745	0.00206267	0.00391769	0.0307315	0.0026231	1.99411	1	1	2	3	12	1.20544
	Female	10000	7934	0.00246779	3.2379e-07	0.000866782	0.00196507	0.00350557	0.0183056	0.00210331	2.05798	1	1	2	3	9	1.14714
	Male	10000	6632	0.00299297	3.30664e-07	0.000872504	0.00213477	0.00421202	0.0225902	0.00287251	1.75754	1	1	1	2	7	0.98749
5th cousins	Model	Simulated pairs	Pairs with retained IBD	Mean	Q 0	Q 25	Q 50	Q 75	Q 100	SD	Mean	Q 0	Q 25	Q 50	Q 75	Q 100	SD
	SS+intf	10000	3265	0.00147394	3.3171e-08	0.000440566	0.00107496	0.00210651	0.00907268	0.00136217	1.27688	1	1	1	1	6	0.555086
	SA+intf	10000	3222	0.00149801	2.4669e-07	0.000477856	0.00109579	0.00212594	0.00968087	0.00135764	1.26226	1	1	1	1	5	0.545761
	SS+Poiss	10000	3098	0.0016387	4.37199e-07	0.000463629	0.00115246	0.00228355	0.015748	0.00162939	1.37928	1	1	1	2	9	0.700419
	SA+Poiss	10000	2999	0.00157595	3.471e-07	0.000469454	0.00112068	0.00219839	0.0142556	0.0015279	1.34645	1	1	1	2	6	0.660786
	Female	10000	3755	0.00134648	1.82291e-08	0.0004338	0.00100518	0.0019	0.00940454	0.00123072	1.30839	1	1	1	2	5	0.59138
	Male	10000	2822	0.00178253	8.09401e-07	0.000468891	0.00114841	0.00250823	0.0112773	0.0017993	1.23742	1	1	1	1	5	0.530839
6th cousins	Model	Simulated pairs	Pairs with retained IBD	Mean	Q 0	Q 25	Q 50	Q 75	Q 100	SD	Mean	Q 0	Q 25	Q 50	Q 75	Q 100	SD
	SS+intf	10000	1112	0.00113143	5.66297e-08	0.000348393	0.000847738	0.00152125	0.00797716	0.0010798	1.10432	1	1	1	1	3	0.331241
	SA+intf	10000	1129	0.00110495	1.2203e-06	0.000347747	0.000743206	0.00153681	0.00955786	0.00111184	1.10717	1	1	1	1	4	0.326207
	SS+Poiss	10000	991	0.00120202	7.38428e-07	0.000379198	0.000847555	0.00162748	0.00829266	0.00116798	1.18365	1	1	1	1	5	0.450112
	SA+Poiss	10000	991	0.00118222	2.66414e-07	0.000333616	0.000832203	0.00165886	0.00765926	0.00116912	1.17255	1	1	1	1	5	0.457809
	Female	10000	1314	0.000968346	3.19756e-08	0.000294056	0.000671457	0.0013863	0.00645592	0.000937934	1.10883	1	1	1	1	4	0.346276
	Male	10000	899	0.00137491	3.31112e-07	0.000330041	0.000810493	0.00192294	0.00837952	0.00149123	1.09455	1	1	1	1	4	0.314751

## Sheet: Admix rate estimates
T = 2		SS+Intf	SS+Poiss	SA+Intf	SA+Poiss		SD diff SS vs SA	SD diff intf vs Poiss
	Mean	2.12402	2.10377	2.08161	2.12337
	SD	0.79418	0.811913	0.581832	0.719735		1.23397	0.101613
T = 3		SS+Intf	SS+Poiss	SA+Intf	SA+Poiss
	Mean	3.04284	3.05721	3.03713	3.03805
	SD	0.532835	0.607107	0.486791	0.542999		1.10697	0.113452
T = 4		SS+Intf	SS+Poiss	SA+Intf	SA+Poiss
	Mean	4.02367	4.03778	4.02364	4.03208
	SD	0.563467	0.635011	0.495177	0.570179		1.12496	0.121596
T = 6		SS+Intf	SS+Poiss	SA+Intf	SA+Poiss
	Mean	5.96795	5.96622	5.97305	5.97102
	SD	0.65222	0.72765	0.599931	0.691861		1.06818	0.1179
						Averages:	1.13352	0.11364

## Sheet: Relatedness inference
Relationship	Model	Fraction relationship correctly inferred	Bootstrap	SE distance from SAMAFS validated
Full siblings	SS+intf	1	0
Full siblings	SA+intf	0.9997	0.000173218
Full siblings	SS+Poiss	0.9997	0.000173111
Full siblings	SA+Poiss	0.9997	0.000172397
Full siblings	SAMAFS	1	0
First cousins	SS+intf	0.9643	0.00185549	-0.213933
First cousins	SA+intf	0.9666	0.00180172	-0.834882
First cousins	SS+Poiss	0.9351	0.00246145	6.97058
First cousins	SA+Poiss	0.9491	0.00218419	3.68003
First cousins	SAMAFS	0.9465	0.00420301
First cousins	SAMAFS validated	0.9635	0.00324668
First cousins once removed	SS+intf	0.8245	0.00380377	-0.463457
First cousins once removed	SA+intf	0.8395	0.00365821	-2.36256
First cousins once removed	SS+Poiss	0.7825	0.00409801	4.71223
First cousins once removed	SA+Poiss	0.7913	0.00408882	3.63159
First cousins once removed	SAMAFS	0.8067	0.00497308
First cousins once removed	SAMAFS validated	0.8208	0.00701906
Second cousins	SS+intf	0.6647	0.00471712	0.328572
Second cousins	SA+intf	0.6765	0.00463692	-0.417659
Second cousins	SS+Poiss	0.6069	0.00490992	3.9661
Second cousins	SA+Poiss	0.6222	0.00493983	3.00116
Second cousins	SAMAFS	0.6815	0.00919291
Second cousins	SAMAFS validated	0.6699	0.0151067

## Sheet: SAMAFS Full sib IBD frac
Fraction genome IBD	Fraction genome IBD2
0.545695	0.277315
0.526794	0.273301
0.506645	0.266743
0.497686	0.264228
0.526375	0.259972
0.526847	0.280109
0.45742	0.213946
0.536902	0.26481
0.542255	0.304188
0.519299	0.302312
0.482185	0.233617
0.500174	0.231046
0.592207	0.336736
0.520112	0.2852
0.479411	0.214636
0.521106	0.261167
0.554936	0.297149
0.462114	0.244446
0.524691	0.291265
0.538519	0.311218
0.511949	0.256808
0.512671	0.249796
0.545078	0.279575
0.525676	0.264525
0.497822	0.260616
0.554613	0.329278
0.473544	0.23538
0.460633	0.2001
0.495294	0.267782
0.526269	0.276535
0.439997	0.171367
0.509099	0.25094
0.466517	0.22589
0.535043	0.281835
0.498526	0.26625
0.544888	0.30759
0.520787	0.295226
0.493308	0.223915
0.488363	0.247927
0.554232	0.307881
0.507407	0.26564
0.558656	0.276518
0.458813	0.196082
0.476545	0.246721
0.500503	0.250952
0.543568	0.310086
0.479707	0.236855
0.470802	0.224306
0.497704	0.251393
0.499118	0.276871
0.492019	0.255921
0.494242	0.267362
0.496124	0.259305
0.451473	0.212798
0.501251	0.243443
0.510443	0.246493
0.524957	0.258712
0.481991	0.227456
0.473525	0.236279
0.488875	0.262189
0.445941	0.18438
0.444125	0.19588
0.49986	0.229764
0.446442	0.198894
0.533536	0.260494
0.456192	0.206769
0.517042	0.222333
0.504807	0.220117
0.526218	0.268746
0.458731	0.181458
0.504062	0.277836
0.534544	0.26695
0.472393	0.204058
0.516817	0.272612
0.526946	0.262976
0.530095	0.266586
0.524055	0.291016
0.506408	0.277511
0.472165	0.21346
0.50902	0.251868
0.449633	0.206629
0.512153	0.282243
0.492359	0.226274
0.548023	0.315891
0.489295	0.253911
0.484537	0.234206
0.502244	0.30859
0.51494	0.249669
0.508268	0.262686
0.460049	0.178506
0.476239	0.217746
0.482987	0.253051
0.56055	0.315551
0.51302	0.288131
0.501458	0.239384
0.60347	0.352205
0.524272	0.287117
0.481798	0.235024
0.486607	0.239997
0.473926	0.224848
0.520851	0.265738
0.532007	0.309504
0.494235	0.280334
0.463981	0.243177
0.413992	0.143229
0.524955	0.296381
0.494864	0.267533
0.566452	0.336917
0.528084	0.269417
0.530976	0.279566
0.544128	0.283682
0.459165	0.199174
0.438834	0.203898
0.448931	0.212486
0.449535	0.169541
0.52719	0.268283
0.450375	0.188041
0.485251	0.260131
0.493895	0.25401
0.459155	0.188672
0.455166	0.209185
0.557403	0.285842
0.562822	0.345466
0.508936	0.276758
0.408829	0.162894
0.464565	0.209421
0.531442	0.254547
0.57274	0.334033
0.506525	0.245614
0.506849	0.292115
0.513603	0.246946
0.465982	0.212799
0.485745	0.239492
0.567883	0.325828
0.472065	0.216255
0.52872	0.266852
0.505121	0.263334
0.449622	0.229145
0.518565	0.293958
0.476307	0.211998
0.469528	0.252693
0.526837	0.285941
0.456287	0.202291
0.478907	0.213391
0.510126	0.273983
0.446118	0.205284
0.423832	0.163522
0.542662	0.298716
0.467658	0.229012
0.473223	0.216244
0.551425	0.275809
0.51317	0.28306
0.463611	0.189678
0.473243	0.188591
0.445347	0.17954
0.499442	0.230792
0.509087	0.229623
0.540562	0.296182
0.471896	0.224101
0.552534	0.309667
0.45341	0.179631
0.433516	0.22506
0.478845	0.229084
0.512469	0.248819
0.451918	0.188637
0.478872	0.216208
0.485557	0.256489
0.49862	0.219174
0.537677	0.302107
0.51813	0.249917
0.515951	0.246166
0.467396	0.210085
0.430387	0.174206
0.450798	0.199473
0.522293	0.272129
0.568565	0.345009
0.466924	0.198611
0.51604	0.264506
0.531315	0.275899
0.570409	0.309083
0.43429	0.225336
0.486166	0.234811
0.438881	0.208452
0.514945	0.278069
0.511184	0.262866
0.423797	0.21137
0.537782	0.249701
0.529333	0.290985
0.498045	0.221254
0.46825	0.198315
0.495758	0.28072
0.468059	0.230895
0.519839	0.270727
0.586053	0.336219
0.481545	0.250592
0.555862	0.2925
0.528853	0.282782
0.476049	0.208197
0.526985	0.294357
0.500351	0.186536
0.52483	0.295394
0.524866	0.31972
0.515012	0.257557
0.510043	0.238774
0.561108	0.328119
0.487228	0.25074
0.477741	0.226988
0.45856	0.221117
0.431328	0.210989
0.5165	0.316421
0.457935	0.203805
0.435418	0.198013
0.52546	0.276153
0.520518	0.274525
0.45889	0.214562
0.56762	0.316438
0.484666	0.187582
0.482603	0.19472
0.539211	0.281953
0.494016	0.27529
0.496471	0.270485
0.486583	0.202061
0.522232	0.312621
0.516597	0.273564
0.456037	0.199083
0.444803	0.203589
0.530647	0.283657
0.530762	0.317241
0.467442	0.218504
0.488241	0.24702
0.477338	0.258596
0.531216	0.304665
0.529282	0.291305
0.522082	0.272638
0.508012	0.242686
0.526635	0.264547
0.530388	0.26105
0.505009	0.22358
0.515338	0.25186
0.534801	0.282282
0.461117	0.219574
0.490772	0.255678
0.464058	0.188721
0.482095	0.218558
0.481788	0.192408
0.472731	0.212125
0.514378	0.262365
0.460565	0.220477
0.513405	0.244974
0.474685	0.211402
0.500428	0.281769
0.471659	0.206919
0.598227	0.402612
0.469744	0.234671
0.570543	0.324981
0.44219	0.186085
0.475153	0.201588
0.532118	0.310324
0.579234	0.306317
0.427563	0.18122
0.477729	0.234051
0.481944	0.239896
0.532374	0.310874
0.584095	0.336162
0.482606	0.258845
0.546337	0.27892
0.487229	0.239553
0.535656	0.276752
0.438335	0.218006
0.538094	0.269841
0.53167	0.26871
0.470613	0.243273
0.472054	0.228495
0.482872	0.2527
0.507062	0.273503
0.524011	0.287667
0.443062	0.172842
0.505035	0.253803
0.498761	0.242812
0.515605	0.273693
0.530527	0.27585
0.496417	0.259788
0.508144	0.281566
0.534122	0.294281
0.4925	0.235524
0.534705	0.275478
0.52256	0.252991
0.462506	0.21452
0.517283	0.268292
0.514103	0.276906
0.571372	0.347989
0.480666	0.248045
0.495596	0.250163
0.542525	0.291921
0.478811	0.1985
0.478518	0.214371
0.43291	0.195618
0.467107	0.210785
0.482558	0.221686
0.487246	0.222895
0.517841	0.239286
0.512333	0.306645
0.513275	0.22965
0.60231	0.363741
0.47551	0.193931
0.5321	0.307812
0.519377	0.300697
0.54134	0.296045
0.551969	0.259485
0.568069	0.324158
0.526618	0.244721
0.482514	0.21938
0.441589	0.207687
0.493961	0.266502
0.58379	0.326033
0.429538	0.143173
0.517983	0.236922
0.547719	0.293945
0.541542	0.265813
0.486445	0.23706
0.444774	0.206771
0.522859	0.259974
0.46932	0.197474
0.547242	0.294485
0.427732	0.12976
0.507173	0.219292
0.589169	0.328416
0.579098	0.354341
0.502723	0.273548
0.494402	0.258319
0.48189	0.238385
0.512109	0.252443
0.49886	0.262714
0.572959	0.307722
0.514283	0.270551
0.487916	0.245464
0.476209	0.202686
0.490924	0.28561
0.476971	0.229838
0.444462	0.195694
0.492906	0.241578
0.464969	0.199023
0.526458	0.249283
0.551631	0.305532
0.500689	0.253493
0.490534	0.268657
0.578717	0.346142
0.51109	0.219273
0.468632	0.233525
0.453401	0.209057
0.552725	0.293086
0.542964	0.256928
0.485755	0.273722
0.493626	0.225656
0.475715	0.217986
0.509927	0.28296
0.517021	0.267812
0.515428	0.280926
0.547396	0.340164
0.48678	0.206571
0.488514	0.230854
0.503447	0.24093
0.55826	0.336458
0.492138	0.26589
0.486513	0.266894
0.526831	0.268405
0.459561	0.198489
0.495593	0.217353
0.473532	0.252147
0.472729	0.213793
0.516681	0.244307
0.499093	0.232081
0.463403	0.194728
0.511972	0.260281
0.566973	0.278406
0.537531	0.277117
0.470291	0.261914
0.477095	0.240932
0.495221	0.246184
0.555348	0.304449
0.480917	0.227092
0.449996	0.211127
0.433793	0.189491
0.477637	0.221596
0.486438	0.219614
0.531159	0.284916
0.535522	0.2571
0.532643	0.302484
0.586132	0.339577
0.537744	0.321406
0.529384	0.257983
0.491017	0.235629
0.513591	0.241531
0.502247	0.23383
0.490763	0.245048
0.568028	0.32814
0.480259	0.236855
0.487394	0.208137
0.480967	0.240663
0.448253	0.196528
0.436728	0.177365
0.51678	0.262816
0.52975	0.26717
0.45409	0.220746
0.462659	0.239572
0.528896	0.28612
0.493823	0.238362
0.473616	0.214747
0.525924	0.293063
0.517505	0.280188
0.538437	0.263841
0.425941	0.151783
0.416362	0.158169
0.494998	0.263192
0.541811	0.270503
0.4832	0.245735
0.523147	0.249167
0.487393	0.23212
0.490543	0.244617
0.481416	0.206582
0.491647	0.259317
0.481071	0.21764
0.470095	0.231749
0.48156	0.246489
0.499005	0.266185
0.467566	0.219255
0.548597	0.31909
0.518577	0.303646
0.52617	0.272295
0.39558	0.154229
0.441061	0.196118
0.4714	0.19927
0.516004	0.257847
0.485939	0.226397
0.504846	0.243336
0.511166	0.250904
0.536453	0.278236
0.499739	0.23307
0.498904	0.239972
0.484523	0.228268
0.548061	0.277563
0.436525	0.180344
0.541463	0.276479
0.435321	0.193867
0.52436	0.28946
0.505882	0.260265
0.45455	0.18574
0.470286	0.218587
0.485176	0.243948
0.499316	0.222083
0.493771	0.308293
0.528233	0.280914
0.432501	0.198866
0.460173	0.225326
0.476195	0.217091
0.444899	0.202136
0.502064	0.236761
0.557705	0.326747
0.502794	0.212521
0.519353	0.262371
0.466744	0.234372
0.522149	0.25524
0.543264	0.272339
0.50841	0.240342
0.510291	0.258613
0.502691	0.246208
0.470009	0.219562
0.46282	0.18921
0.529231	0.294641
0.498822	0.256154
0.508767	0.261522
0.475999	0.23151
0.505378	0.235464
0.46165	0.200501
0.454079	0.189172
0.430088	0.197029
0.53735	0.266569
0.490638	0.241847
0.476204	0.225752
0.490659	0.20568
0.455277	0.220008
0.416963	0.183753
0.428917	0.198233
0.56799	0.276306
0.49476	0.277391
0.443282	0.204031
0.58546	0.31588
0.418603	0.188101
0.502879	0.26635
0.561078	0.316959
0.579088	0.35747
0.476007	0.232196
0.477945	0.215604
0.45277	0.200582
0.439305	0.184875
0.520177	0.276051
0.467404	0.236724
0.580544	0.341972
0.561432	0.32741
0.555188	0.302934
0.49715	0.247235
0.549035	0.297946
0.488269	0.222283
0.49382	0.231487
0.547101	0.32168
0.486025	0.226852
0.51462	0.294
0.576245	0.310449
0.480327	0.248069
0.483323	0.217534
0.511279	0.239569
0.521374	0.277651
0.53524	0.290941
0.465877	0.193304
0.511002	0.255045
0.486705	0.205046
0.479079	0.230432
0.512265	0.233345
0.590264	0.334547
0.511121	0.258088
0.460533	0.215928
0.527468	0.266639
0.53059	0.277886
0.457782	0.21266
0.516678	0.264708
0.512688	0.265553
0.538939	0.275415
0.474105	0.208613
0.486846	0.252586
0.446183	0.20615
0.53719	0.270375
0.523358	0.289233
0.454026	0.186645
0.558373	0.307101
0.468101	0.219492
0.557361	0.317972
0.551139	0.2798
0.485575	0.238521
0.456542	0.227062
0.486099	0.244801
0.48611	0.244791
0.494739	0.300496
0.509027	0.230538
0.515692	0.226666
0.512012	0.251624
0.528646	0.240539
0.455377	0.210254
0.456374	0.219868
0.510392	0.254133
0.50859	0.214381
0.561953	0.3397
0.422249	0.178517
0.549123	0.304797
0.574292	0.307465
0.554054	0.300678
0.476248	0.241469
0.499376	0.212798
0.486958	0.241456
0.490645	0.246376
0.485568	0.205447
0.433372	0.170408
0.460765	0.214237
0.445506	0.197873
0.516571	0.258765
0.460825	0.210466
0.457889	0.236858
0.495334	0.247036
0.41342	0.166833
0.531251	0.251631
0.479204	0.244511
0.508819	0.215663
0.503045	0.244706
0.505745	0.259025
0.513511	0.267839
0.482975	0.224102
0.48579	0.218783
0.491214	0.252529
0.473977	0.235297
0.461237	0.203064
0.562805	0.325289
0.516102	0.256413
0.540177	0.293379
0.474303	0.223896
0.480188	0.2096
0.511704	0.246914
0.589303	0.368396
0.549564	0.314867
0.514302	0.264982
0.479869	0.232596
0.542207	0.286562
0.495699	0.263871
0.482238	0.222921
0.534088	0.297342
0.503399	0.207895
0.491572	0.225491
0.481786	0.245827
0.522101	0.250994
0.523361	0.264011
0.522536	0.263599
0.490874	0.221686
0.464086	0.218709
0.460889	0.22941
0.478966	0.246591
0.517026	0.290506
0.483692	0.225469
0.531967	0.28613
0.462316	0.179733
0.535171	0.289744
0.53164	0.278366
0.535415	0.316699
0.522015	0.253802
0.471455	0.196125
0.461658	0.247387
0.465881	0.231818
0.588254	0.373123
0.445722	0.21304
0.491728	0.236103
0.472893	0.178097
0.526883	0.287565
0.457433	0.195448
0.595792	0.327701
0.534311	0.257128
0.57093	0.309321
0.495096	0.214664
0.490096	0.251291
0.523113	0.277765
0.511154	0.276232
0.498927	0.254734
0.55267	0.297278
0.452458	0.227908
0.470892	0.207345
0.503101	0.227742
0.508696	0.276814
0.438088	0.183831
0.517634	0.293288
0.480811	0.219352
0.485814	0.262476
0.519557	0.236992
0.448582	0.201131
0.512828	0.278763
0.490154	0.227813
0.505953	0.273936
0.499852	0.260531
0.507532	0.286662
0.531114	0.287776
0.492689	0.253524
0.451667	0.198598
0.538893	0.29453
0.505405	0.27591
0.476633	0.245762
0.477071	0.247824
0.430099	0.193505
0.472037	0.230844
0.474953	0.203762
0.567646	0.324712
0.486665	0.270092
0.536971	0.263367
0.48141	0.199189
0.522872	0.257029
0.493016	0.256238
0.538331	0.310211
0.469533	0.216683
0.461227	0.18046
0.430415	0.146447
0.560872	0.34215
0.512391	0.245993
0.559888	0.285777
0.503976	0.22395
0.498946	0.219244
0.456097	0.238036
0.48603	0.216059
0.490031	0.240236
0.511068	0.272088
0.538658	0.291643
0.592978	0.351864
0.45211	0.170581
0.519271	0.248348
0.530933	0.309897
0.455395	0.199032
0.510236	0.266582
0.545244	0.322323
0.558774	0.320651
0.456012	0.215355
0.513391	0.272774
0.481887	0.229424
0.504905	0.245513
0.462639	0.213582
0.50419	0.248069
0.513402	0.232437
0.552275	0.31146
0.458361	0.223454
0.534473	0.288407
0.445429	0.198024
0.527184	0.298876
0.445527	0.213907
0.445217	0.2112
0.477621	0.226873
0.469634	0.21174
0.471972	0.222291
0.565543	0.32996
0.487478	0.214067
0.488058	0.259083
0.517297	0.303191
0.464443	0.206382
0.531774	0.24998
0.457457	0.205105
0.460537	0.218402
0.476154	0.201606
0.511726	0.250455
0.459968	0.201844
0.463014	0.201205
0.49564	0.236591
0.467121	0.204633
0.453713	0.20566
0.54193	0.300415
0.574255	0.322964
0.436787	0.186515
0.496283	0.256745
0.516916	0.284284
0.476606	0.225407
0.518312	0.231681
0.446018	0.190183
0.508042	0.257179
0.436504	0.186105
0.524107	0.267767
0.443207	0.232196
0.516612	0.290265
0.505917	0.223981
0.542532	0.291682
0.497698	0.28451
0.569176	0.34442
0.473285	0.217141
0.545108	0.301849
0.492161	0.203766
0.525914	0.280596
0.507454	0.243331
0.54929	0.340271
0.450247	0.203687
0.528742	0.283965
0.497938	0.263744
0.505807	0.300004
0.518934	0.254654
0.498747	0.249531
0.434937	0.181239
0.501792	0.214866
0.419067	0.135269
0.523534	0.25172
0.50124	0.266412
0.525578	0.276963
0.486648	0.235781
0.476923	0.242753
0.464349	0.214464
0.393395	0.154561
0.467674	0.223393
0.54487	0.303884
0.471772	0.23743
0.489239	0.227924
0.527354	0.314337
0.473028	0.215749
0.558807	0.279854
0.502347	0.266078
0.487067	0.27862
0.453087	0.18943
0.481557	0.242301
0.498225	0.238763
0.454464	0.18649
0.506581	0.220742
0.558309	0.313
0.437826	0.163635
0.497422	0.240138
0.480765	0.21498
0.514575	0.249051
0.551642	0.295464
0.507555	0.28078
0.549451	0.324504
0.501076	0.223433
0.535394	0.259534
0.485411	0.201116
0.466416	0.234496
0.510773	0.260412
0.508812	0.256419
0.545014	0.314421
0.533372	0.313514
0.492476	0.199023
0.486859	0.227555
0.500846	0.239633
0.415161	0.1678
0.520594	0.255171
0.490396	0.25292
0.510347	0.262872
0.520142	0.259796
0.487345	0.240722
0.457462	0.199143
0.514196	0.273341
0.555289	0.367322
0.542194	0.280431
0.518037	0.27988
0.506823	0.228809
0.559355	0.321896
0.612923	0.374774
0.47509	0.227714
0.502001	0.247536
0.503825	0.28192
0.507907	0.258308
0.601808	0.379854
0.510583	0.261753
0.485032	0.201225
0.471635	0.218053
0.465351	0.206392
0.553493	0.306752
0.553499	0.302653
0.476352	0.216279
0.454447	0.230613
0.503849	0.249497
0.470796	0.225705
0.43185	0.239937
0.513686	0.283745
0.493998	0.248626
0.477501	0.218846
0.501316	0.273131
0.449027	0.186175
0.545442	0.303271
0.468666	0.248795
0.539367	0.279355
0.523062	0.284046
0.474208	0.1814
0.443238	0.190562
0.49547	0.243079
0.544232	0.270463
0.45235	0.213846
0.524578	0.262674
0.522507	0.259001
0.470751	0.229955
0.498958	0.260201
0.482818	0.23293
0.500948	0.227527
0.462151	0.222965
0.458334	0.219664
0.493277	0.223506
0.558713	0.338219
0.426288	0.206772
0.552833	0.312063
0.512994	0.278033
0.577854	0.337526
0.501985	0.224636
0.500265	0.25205
0.573719	0.309801
0.500572	0.200268
0.441595	0.205643
0.485447	0.19914
0.513032	0.280645
0.51367	0.27096
0.46027	0.189467
0.482203	0.209926
0.436546	0.210504
0.506637	0.236977
0.554924	0.283545
0.474118	0.231371
0.542374	0.30349
0.481459	0.195503
0.511365	0.223892
0.537835	0.303717
0.521674	0.268927
0.523924	0.279183
0.517763	0.280284
0.455441	0.179813
0.51543	0.267824
0.488765	0.243469
0.533446	0.252286
0.549967	0.318771
0.480382	0.210946
0.485272	0.230471
0.478767	0.199142
0.496139	0.244567
0.491168	0.23922
0.465549	0.195821
0.520292	0.239494
0.518124	0.259639
0.476696	0.245899
0.536922	0.298688
0.469757	0.18464
0.42494	0.180102
0.491764	0.242142
0.525875	0.276411
0.543982	0.286067
0.483365	0.228665
0.564732	0.328288
0.553602	0.289717
0.519644	0.283678
0.508258	0.216327
0.559622	0.28553
0.472428	0.228266
0.467748	0.21826
0.426865	0.170865
0.539209	0.296812
0.438447	0.186957
0.506171	0.263127
0.529452	0.28083
0.491739	0.234125
0.560029	0.31178
0.507186	0.24252
0.55109	0.320141
0.513394	0.257037
0.500194	0.263515
0.519797	0.29168
0.520712	0.293557
0.460183	0.199785
0.535525	0.287114
0.511469	0.264275
0.526248	0.236662
0.50231	0.224024
0.487993	0.226097
0.488131	0.244125
0.541379	0.266765
0.515304	0.261295
0.469637	0.234754
0.504529	0.240723
0.548618	0.305278
0.44787	0.21633
0.530407	0.263007
0.538184	0.297967
0.500558	0.252484
0.524524	0.279954
0.46474	0.211494
0.500859	0.252678
0.536636	0.312738
0.498648	0.271128
0.550855	0.297457
0.503265	0.22939
0.482908	0.224684
0.539108	0.269306
0.486595	0.257023
0.504493	0.246084
0.483583	0.23771
0.512605	0.277772
0.477333	0.23561
0.538169	0.261996
0.485136	0.268517
0.491133	0.215975
0.494219	0.210172
0.509511	0.268074
0.456783	0.182786
0.538964	0.311771
0.513285	0.294724
0.479903	0.253025
0.519354	0.263774
0.443542	0.184856
0.511857	0.248396
0.524945	0.259092
0.509908	0.256259
0.501263	0.252708
0.457952	0.197928
0.448021	0.213525
0.510593	0.266438
0.492005	0.245396
0.482678	0.22248
0.598539	0.360867
0.5029	0.248042
0.558567	0.304863
0.468321	0.188892
0.546143	0.299282
0.407876	0.157876
0.461324	0.167511
0.549376	0.297543
0.565606	0.324618
0.484932	0.252033
0.469422	0.207165
0.510701	0.27436
0.496765	0.245409
0.486038	0.211724
0.477208	0.223003
0.542279	0.266703
0.515006	0.263238
0.451947	0.228236
0.467395	0.22033
0.514061	0.231956
0.472332	0.233019
0.522449	0.308803
0.394337	0.142839
0.579568	0.325972
0.456851	0.205093
0.510235	0.266104
0.513515	0.255787
0.475902	0.251778
0.514846	0.243088
0.482159	0.238761
0.519694	0.246132
0.512449	0.277322
0.507537	0.207204
0.507269	0.263335
0.495655	0.245052
0.515977	0.276814
0.508368	0.277629
0.507589	0.274091
0.464914	0.21171
0.46352	0.207956
0.50283	0.219811
0.498953	0.245714
0.530328	0.295398
0.580697	0.352217
0.582262	0.329073
0.580788	0.329675
0.514748	0.2815
0.539942	0.311803
0.555319	0.295038
0.514676	0.250255
0.47669	0.228472
0.433556	0.17703
0.544121	0.2736
0.472403	0.209637
0.408321	0.158556
0.500799	0.24661
0.523137	0.302149
0.524217	0.250343
0.458938	0.211267
0.501401	0.228781
0.502385	0.247971
0.481888	0.222845
0.468703	0.22012
0.480919	0.205687
0.523864	0.275077
0.516541	0.241046
0.477909	0.215657
0.521002	0.267441
0.527266	0.269943
0.515954	0.279958
0.479663	0.231381
0.481231	0.267942
0.49079	0.264528
0.505091	0.268283
0.469836	0.218523
0.476571	0.204674
0.51939	0.245715
0.538904	0.316214
0.471438	0.223652
0.462427	0.196069
0.450585	0.160592
0.532067	0.251889
0.51841	0.241263
0.47733	0.227631
0.484007	0.214164
0.541088	0.301199
0.495519	0.273113
0.479629	0.194224
0.406902	0.18196
0.524474	0.281176
0.41701	0.149047
0.531492	0.303199
0.560916	0.316299
0.544771	0.284933
0.502442	0.266992
0.491126	0.233481
0.489382	0.224659
0.459176	0.203742
0.426997	0.154499
0.517951	0.275362
0.457486	0.183845
0.440289	0.186357
0.561147	0.338336
0.487333	0.253274
0.548588	0.305828
0.541023	0.295006
0.52612	0.269159
0.573421	0.331458
0.520258	0.277174
0.530799	0.271966
0.506905	0.240112
0.52615	0.291662
0.480418	0.218464
0.539249	0.265674
0.544654	0.302686
0.553416	0.316273
0.521234	0.256168
0.520054	0.247792
0.477257	0.203266
0.486339	0.244275
0.500122	0.271753
0.592956	0.360525
0.542564	0.278223
0.460851	0.214497
0.497041	0.220899
0.457718	0.185918
0.432783	0.172226
0.524582	0.2781
0.489806	0.253062
0.499457	0.248102
0.467694	0.241204
0.511776	0.26735
0.474414	0.187912
0.445046	0.1871
0.494143	0.247229
0.415864	0.147031
0.532756	0.288269
0.507073	0.261033
0.497144	0.207417
0.508063	0.26836
0.419612	0.159233
0.511875	0.251222
0.507298	0.274539
0.510636	0.27133
0.469262	0.240499
0.501036	0.259383
0.497863	0.272619
0.492132	0.231356
0.471682	0.216368
0.534862	0.300793
0.509781	0.261808
0.506754	0.26447
0.512547	0.247781
0.602691	0.367252
0.404154	0.201291
0.562126	0.337105
0.441632	0.188059
0.526326	0.261097
0.392099	0.150272
0.512243	0.278354
0.499643	0.202872
0.529519	0.270799
0.503953	0.275679
0.536926	0.27316
0.487728	0.266171
0.514832	0.23939
0.464087	0.220635
0.454605	0.217348
0.512793	0.242621
0.477578	0.214441
0.58279	0.34436
0.510684	0.305979

## Sheet: SAMAFS First cousin IBD frac
Fraction genome IBD	Validated?
0.0974156	YES
0.12592	YES
0.126485	YES
0.10938	YES
0.114844	YES
0.0779185	YES
0.111987	YES
0.12213	YES
0.130685	YES
0.103093	YES
0.122482	YES
0.114814	YES
0.120104	YES
0.101094	YES
0.139622	YES
0.108067	YES
0.114306	YES
0.123168	YES
0.109723	YES
0.174905	YES
0.132259	YES
0.151716	YES
0.127221	YES
0.116339	YES
0.133657	YES
0.0798336	YES
0.183062	YES
0.0923568	YES
0.118259	YES
0.127562	YES
0.129808	YES
0.130039	YES
0.131406	YES
0.148549	YES
0.144268	YES
0.165941	YES
0.122086	YES
0.115003	YES
0.0956796	YES
0.113527	YES
0.103166	YES
0.10785	YES
0.128784	YES
0.122712	YES
0.111821	YES
0.1018	YES
0.127963	YES
0.118223	YES
0.129311	YES
0.140503	YES
0.0893623	YES
0.0772155	YES
0.103705	YES
0.152016	YES
0.104783	YES
0.116066	YES
0.110677	YES
0.134247	YES
0.0786364	YES
0.0944556	YES
0.0894789	YES
0.127348	YES
0.098885	YES
0.105718	YES
0.13197	YES
0.104322	YES
0.085708	YES
0.0902486	YES
0.103956	YES
0.185375	YES
0.181603	YES
0.163706	YES
0.159102	YES
0.189529	YES
0.16269	YES
0.188539	YES
0.14253	YES
0.189109	YES
0.173629	YES
0.14286	YES
0.138265	YES
0.217775	YES
0.17708	YES
0.139839	YES
0.17453	YES
0.15043	YES
0.158394	YES
0.206328	YES
0.172194	YES
0.164339	YES
0.161658	YES
0.134475	YES
0.1596	YES
0.205311	YES
0.191712	YES
0.165635	YES
0.159262	YES
0.169431	YES
0.16382	YES
0.180417	NO
0.18483	NO
0.152825	NO
0.173201	NO
0.163318	NO
0.131787	NO
0.170411	NO
0.135874	NO
0.150064	NO
0.136684	NO
0.16257	NO
0.105361	YES
0.105836	YES
0.108082	YES
0.121072	YES
0.130631	YES
0.105326	YES
0.0988047	YES
0.113554	YES
0.109088	YES
0.103431	YES
0.0907845	YES
0.112402	YES
0.0954155	YES
0.0926143	YES
0.0881736	YES
0.128236	YES
0.0122254	NO
0.108003	YES
0.106739	YES
0.121124	YES
0.0915712	YES
0.107406	YES
0.0908721	YES
0.131475	YES
0.137664	YES
0.12652	YES
0.103792	YES
0.119742	YES
0.10367	YES
0.134731	YES
0.12943	YES
0.12759	YES
0.122582	NO
0.12159	NO
0.123138	NO
0.103754	NO
0.147191	NO
0.13479	NO
0.120886	NO
0.124969	NO
0.111769	NO
0.107471	NO
0.118898	NO
0.112587	NO
0.156953	NO
0.137898	NO
0.144877	NO
0.13621	NO
0.120256	NO
0.116918	NO
0.127389	NO
0.10914	NO
0.158433	NO
0.136608	NO
0.139917	NO
0.109768	NO
0.137604	NO
0.11387	NO
0.139603	NO
0.0986254	NO
0.108576	NO
0.116345	NO
0.119919	NO
0.094477	NO
0.141299	NO
0.121107	NO
0.123356	NO
0.124297	NO
0.144207	NO
0.148746	NO
0.139131	NO
0.119136	NO
0.147381	NO
0.140748	NO
0.147991	NO
0.117302	NO
0.157707	YES
0.139611	YES
0.15872	YES
0.118869	YES
0.139648	YES
0.157422	YES
0.146218	YES
0.117061	YES
0.133201	YES
0.138137	YES
0.120812	YES
0.117921	YES
0.125358	YES
0.117709	YES
0.144761	YES
0.107728	YES
0.095814	YES
0.128101	YES
0.143547	YES
0.11145	YES
0.101637	YES
0.132627	YES
0.134862	YES
0.151077	YES
0.131366	YES
0.169454	YES
0.144207	YES
0.10855	YES
0.128826	YES
0.147113	YES
0.139902	YES
0.120128	YES
0.110987	YES
0.132294	YES
0.144237	YES
0.120443	YES
0.132444	YES
0.130149	YES
0.110289	YES
0.12771	YES
0.150732	YES
0.153318	YES
0.128958	YES
0.127536	YES
0.1149	YES
0.141412	YES
0.149015	YES
0.144312	YES
0.0945335	YES
0.134956	YES
0.113067	YES
0.125909	YES
0.121344	YES
0.113623	YES
0.111346	YES
0.124135	YES
0.124155	YES
0.11389	YES
0.143929	YES
0.123861	YES
0.132161	YES
0.127106	YES
0.113637	YES
0.10777	YES
0.153523	YES
0.103492	YES
0.132008	YES
0.134803	YES
0.122844	YES
0.122371	YES
0.113032	YES
0.12203	YES
0.152501	YES
0.160811	YES
0.145653	YES
0.136968	YES
0.167376	YES
0.142704	YES
0.147797	YES
0.1521	YES
0.137078	YES
0.135196	YES
0.114867	YES
0.154944	YES
0.139175	YES
0.1468	YES
0.124225	YES
0.116602	YES
0.117064	YES
0.109264	NO
0.125436	NO
0.134983	NO
0.116815	NO
0.12999	NO
0.131276	NO
0.135369	NO
0.10368	NO
0.130161	NO
0.105655	NO
0.113798	NO
0.122536	NO
0.109208	NO
0.106328	NO
0.118021	NO
0.130671	NO
0.131658	NO
0.129144	NO
0.136798	NO
0.123682	NO
0.122421	NO
0.156637	NO
0.168827	NO
0.137659	NO
0.159437	NO
0.113648	NO
0.183836	NO
0.143657	NO
0.111208	YES
0.137113	YES
0.121613	YES
0.134119	YES
0.113344	YES
0.139459	YES
0.112505	YES
0.139919	YES
0.116562	YES
0.111836	YES
0.0995285	YES
0.126428	YES
0.09701	YES
0.114125	NO
0.0980706	NO
0.0960442	NO
0.110762	NO
0.124568	NO
0.137691	NO
0.113039	NO
0.103328	NO
0.102326	NO
0.0933445	NO
0.103938	NO
0.147616	NO
0.122368	NO
0.12537	NO
0.119043	NO
0.139549	NO
0.102545	NO
0.133888	NO
0.0941845	NO
0.120205	NO
0.109466	NO
0.156208	NO
0.0973331	NO
0.133772	NO
0.105388	NO
0.155787	NO
0.106339	NO
0.120043	NO
0.141379	YES
0.160203	YES
0.166047	YES
0.174576	YES
0.150795	YES
0.128955	YES
0.144355	YES
0.159736	YES
0.131016	YES
0.106862	YES
0.137595	YES
0.1278	YES
0.13506	YES
0.144362	YES
0.122432	YES
0.118731	YES
0.166275	YES
0.125249	YES
0.133559	YES
0.0973741	YES
0.12446	YES
0.156852	YES
0.153054	YES
0.135566	YES
0.134579	YES
0.124556	YES
0.107744	YES
0.135129	YES
0.120548	YES
0.121322	YES
0.132371	YES
0.0864168	YES
0.0883552	YES
0.0726295	YES
0.126459	YES
0.117466	YES
0.123588	YES
0.118277	YES
0.14076	YES
0.132664	YES
0.170911	YES
0.117602	YES
0.118524	YES
0.0987043	YES
0.0999131	YES
0.140287	YES
0.0933814	YES
0.111802	YES
0.0833136	YES
0.134032	YES
0.115766	YES
0.13792	YES
0.101673	YES
0.115915	YES
0.10242	YES
0.115088	YES
0.125407	YES
0.125383	YES
0.112266	YES
0.117839	YES
0.134051	YES
0.115179	YES
0.140913	YES
0.122576	YES
0.0970526	YES
0.151485	YES
0.113291	YES
0.105506	YES
0.115208	YES
0.105355	YES
0.143777	YES
0.115712	YES
0.145034	YES
0.130216	YES
0.0970526	YES
0.151485	YES
0.113291	YES
0.105506	YES
0.115208	YES
0.105355	YES
0.143777	YES
0.115712	YES
0.145034	YES
0.130216	YES
0.140898	YES
0.121121	YES
0.135404	YES
0.131958	YES
0.104383	YES
0.124731	YES
0.133822	YES
0.130337	YES
0.135206	YES
0.132745	YES
0.120682	YES
0.169886	YES
0.148592	YES
0.123874	YES
0.126119	YES
0.125448	YES
0.123903	YES
0.129309	YES
0.126189	YES
0.099269	YES
0.134405	YES
0.140652	YES
0.154285	YES
0.133438	YES
0.13601	YES
0.134184	YES
0.133578	YES
0.135992	YES
0.122178	YES
0.166071	YES
0.162174	YES
0.127485	YES
0.141018	YES
0.157143	YES
0.140816	YES
0.174349	YES
0.152004	YES
0.162283	YES
0.12883	YES
0.130236	YES
0.141378	YES
0.135793	NO
0.170584	NO
0.150031	NO
0.131514	NO
0.138755	NO
0.127983	NO
0.121066	NO
0.104415	NO
0.136425	NO
0.112091	NO
0.120385	NO
0.132008	NO
0.156409	NO
0.169565	NO
0.149436	NO
0.139568	NO
0.142338	NO
0.147082	NO
0.15011	NO
0.141964	NO
0.1358	NO
0.130925	NO
0.118367	NO
0.119582	NO
0.103207	YES
0.135075	YES
0.126694	YES
0.179828	YES
0.147578	YES
0.159012	YES
0.144688	YES
0.151229	YES
0.145326	YES
0.156894	YES
0.137827	YES
0.152272	YES
0.136315	YES
0.152235	YES
0.153893	YES
0.153826	YES
0.140672	YES
0.159006	NO
0.131505	NO
0.130542	NO
0.155456	NO
0.121564	NO
0.153923	NO
0.172098	NO
0.169779	NO
0.15095	NO
0.133722	NO
0.182136	NO
0.149274	NO
0.184852	NO
0.155928	NO
0.14709	NO
0.132204	NO
0.12774	NO
0.154898	NO
0.141603	NO
0.168922	NO
0.157923	NO
0.101067	NO
0.130341	NO
0.137076	NO
0.120076	NO
0.13403	NO
0.146144	NO
0.111761	NO
0.142989	YES
0.157126	YES
0.166991	YES
0.101313	NO
0.139413	NO
0.13113	NO
0.142581	NO
0.129093	NO
0.138915	NO
0.125875	NO
0.146491	YES
0.15445	YES
0.147206	YES
0.114802	NO
0.146273	NO
0.124284	NO
0.14354	NO
0.164367	NO
0.146472	NO
0.139654	NO
0.133871	YES
0.146097	YES
0.150143	YES
0.125524	NO
0.118425	NO
0.133035	NO
0.103833	NO
0.122194	NO
0.116233	NO
0.100131	NO
0.14749	YES
0.135027	YES
0.131005	YES
0.103239	YES
0.161053	YES
0.11594	YES
0.132622	YES
0.132359	YES
0.130189	YES
0.124956	YES
0.133982	YES
0.16867	YES
0.124832	YES
0.159389	YES
0.116982	YES
0.098789	YES
0.164942	YES
0.125783	YES
0.107005	YES
0.121508	YES
0.11371	YES
0.110135	YES
0.122891	YES
0.148624	YES
0.0969683	YES
0.117042	YES
0.105968	YES
0.107079	YES
0.102699	YES
0.12292	YES
0.136721	YES
0.151115	YES
0.0955409	YES
0.106683	YES
0.123483	YES
0.119414	YES
0.137722	YES
0.10701	YES
0.154272	YES
0.150844	YES
0.106375	YES
0.116206	YES
0.0941382	YES
0.104031	YES
0.105798	YES
0.127436	YES
0.154772	YES
0.157155	YES
0.0958548	YES
0.0953133	YES
0.102086	YES
0.126334	YES
0.087487	YES
0.116529	YES
0.123971	YES
0.123229	YES
0.105374	YES
0.128506	YES
0.128707	YES
0.154092	YES
0.144446	YES
0.128114	YES
0.10847	YES
0.157175	YES
0.107821	YES
0.123069	YES
0.125703	YES
0.147677	YES
0.121706	YES
0.151095	YES
0.123706	YES
0.111742	YES
0.170233	YES
0.128	YES
0.143097	YES
0.10106	YES
0.124208	YES
0.14345	YES
0.103732	YES
0.0850336	YES
0.128106	YES
0.102481	YES
0.0942689	YES
0.112493	YES
0.104488	YES
0.104759	YES
0.103907	YES
0.0975192	YES
0.126836	YES
0.11314	YES
0.150798	YES
0.129294	YES
0.131018	YES
0.130977	YES
0.0921148	YES
0.106681	YES
0.129492	YES
0.105192	YES
0.0870389	YES
0.113982	YES
0.0960262	YES
0.132796	YES
0.10642	YES
0.169908	YES
0.107552	YES
0.117864	YES
0.0914385	YES
0.0972427	YES
0.132716	YES
0.122974	YES
0.0962933	YES
0.128436	YES
0.099712	YES
0.137291	YES
0.123338	YES
0.0816045	YES
0.115867	YES
0.0902265	YES
0.11485	YES
0.11456	YES
0.126195	YES
0.0879907	YES
0.084165	YES
0.117445	YES
0.109257	YES
0.113773	YES
0.120572	YES
0.0995649	YES
0.0843955	YES
0.0928257	YES
0.116744	YES
0.0881619	YES
0.111011	YES
0.148906	YES
0.123496	YES
0.118691	YES
0.148905	YES
0.123496	YES
0.118741	YES
0.109513	YES
0.140367	YES
0.128515	YES
0.136478	YES
0.122005	YES
0.148583	YES
0.179063	YES
0.155755	YES
0.138234	YES
0.158377	YES
0.14966	YES
0.0744623	NO
0.160241	YES
0.118113	YES
0.137989	YES
0.144116	YES
0.127188	YES
0.11485	YES
0.118693	YES
0.13495	YES
0.133821	YES
0.131076	YES
0.103856	YES
0.121263	YES
0.136625	YES
0.129847	YES
0.127896	YES
0.149099	YES
0.117028	YES
0.0882853	YES
0.150154	YES
0.132439	YES
0.101152	YES
0.130384	YES
0.111542	YES
0.154595	YES
0.16848	YES
0.131295	YES
0.131216	YES
0.131424	YES
0.120763	YES
0.135865	YES
0.152261	YES
0.129826	YES
0.149982	YES
0.113499	YES
0.155097	YES
0.109965	YES
0.0884537	YES
0.11759	YES
0.131859	YES
0.131969	YES
0.140156	YES
0.107942	YES
0.115336	YES
0.131784	YES
0.12873	YES
0.123378	YES
0.136492	YES
0.123741	YES
0.129158	YES
0.11428	YES
0.108452	YES
0.117376	YES
0.1253	YES
0.109967	YES
0.123753	YES
0.115185	YES
0.127415	YES
0.124648	YES
0.126332	YES
0.125446	YES
0.109441	YES
0.129886	YES
0.136253	YES
0.109335	YES
0.124682	YES
0.13595	YES
0.118372	YES
0.122587	YES
0.14082	YES
0.128761	YES
0.13803	YES
0.11122	YES
0.145176	YES
0.123386	YES
0.120032	YES
0.107266	YES
0.127065	YES
0.117085	YES
0.142779	YES
0.0861254	YES
0.102727	YES
0.114653	YES
0.124173	YES
0.136357	YES
0.152935	YES
0.138732	YES
0.131135	YES
0.113345	YES
0.114851	YES
0.132294	YES
0.126834	YES
0.120368	NO
0.133575	NO
0.125268	NO
0.135856	NO
0.0913962	NO
0.0877945	NO
0.144761	YES
0.0942615	YES
0.0935584	YES
0.120365	YES
0.115306	YES
0.103302	YES
0.128516	NO
0.131087	NO
0.116911	NO
0.100733	NO
0.133211	NO
0.121221	NO
0.0926941	NO
0.138665	NO
0.0965249	NO
0.117348	NO
0.124628	NO
0.130927	NO
0.102459	NO
0.114395	NO
0.10146	NO
0.108104	NO
0.136968	NO
0.0903233	NO
0.116505	NO
0.109613	NO
0.102622	NO
0.108535	NO
0.116078	NO
0.1086	NO
0.0927734	NO
0.0926383	NO
0.136307	NO
0.112613	NO
0.0934572	NO
0.141481	NO
0.110176	NO
0.0957557	NO
0.0886985	NO
0.112655	NO
0.0956661	NO
0.116312	YES
0.140486	YES
0.127633	YES
0.143244	YES
0.117635	YES
0.123021	YES
0.123723	YES
0.115117	YES
0.115917	YES
0.106389	YES
0.0981313	YES
0.138757	YES
0.107565	YES
0.126069	YES
0.115897	YES
0.0944933	YES
0.116461	YES
0.13586	YES
0.14782	YES
0.147104	YES
0.152756	YES
0.137543	YES
0.0815211	YES
0.127125	YES
0.125517	YES
0.134232	YES
0.144673	YES
0.153892	YES
0.177622	YES
0.103002	YES
0.140362	YES
0.139068	YES
0.14154	YES
0.118445	YES
0.0904738	YES
0.123258	YES
0.10612	YES
0.101948	YES
0.131293	YES
0.0959003	YES
0.122078	YES
0.13335	YES
0.129401	YES
0.117693	YES
0.107843	YES
0.126116	YES
0.0795411	YES
0.128449	YES
0.116274	YES
0.119369	YES
0.113199	YES
0.130613	YES
0.148881	YES
0.119175	YES
0.133347	YES
0.130346	YES
0.149694	YES
0.127025	YES
0.129693	YES
0.131083	YES
0.129551	YES
0.0916739	YES
0.0957036	YES
0.0975018	YES
0.0994491	YES
0.120376	YES
0.0929759	YES
0.134061	YES
0.10933	YES
0.110189	YES
0.100107	YES
0.146622	YES
0.14464	YES
0.108724	YES
0.156822	YES
0.12076	YES
0.116723	YES
0.11908	YES
0.105085	YES
0.0995053	YES
0.0869986	YES
0.103271	YES
0.128523	YES
0.124842	YES
0.109304	YES
0.120379	YES
0.0785113	YES
0.0657772	YES
0.110265	YES
0.114756	YES
0.118628	YES
0.100267	YES
0.138054	YES
0.125991	YES
0.0923596	YES
0.101616	YES
0.133969	YES
0.103515	YES
0.114916	YES
0.096813	YES
0.100329	YES
0.104132	YES
0.102924	YES
0.139383	YES
0.101622	YES
0.135813	YES
0.138294	YES
0.0963092	YES
0.136779	YES
0.140742	YES
0.120137	YES
0.0859833	YES
0.111255	YES
0.0993322	YES
0.128465	YES
0.105244	YES
0.106637	YES
0.114257	YES
0.123125	YES
0.0954755	YES
0.126352	YES
0.142597	YES
0.109303	YES
0.0991628	YES
0.0946664	YES
0.125068	YES
0.0927259	YES
0.118141	YES
0.121032	YES
0.120315	YES
0.0755818	NO
0.0941746	NO
0.0844005	NO
0.132602	NO
0.105321	NO
0.0905595	NO
0.085673	NO
0.0678351	NO
0.0808056	NO
0.117541	NO
0.0933353	NO
0.139453	YES
0.126227	YES
0.151618	YES
0.135259	YES
0.134703	YES
0.143341	YES
0.107483	YES
0.115733	YES
0.122818	YES
0.144467	YES
0.138575	YES
0.145227	YES
0.138077	YES
0.104934	YES
0.11025	YES
0.140783	YES
0.134063	YES
0.121773	YES
0.116204	YES
0.13538	YES
0.12308	YES
0.122173	YES
0.124676	YES
0.15628	YES
0.143233	YES
0.137576	YES
0.14679	YES
0.153819	YES
0.132582	YES
0.135863	YES
0.152346	YES
0.133182	YES
0.135738	YES
0.0856973	YES
0.12748	YES
0.101693	YES
0.109407	YES
0.123377	YES
0.087886	YES
0.123134	YES
0.134342	YES
0.143163	YES
0.138319	YES
0.125585	YES
0.141753	YES
0.121626	YES
0.130662	YES
0.148882	YES
0.11202	YES
0.152591	YES
0.128343	YES
0.110689	YES
0.149563	YES
0.126768	YES
0.0941239	YES
0.0884651	YES
0.111777	YES
0.145891	YES
0.149672	YES
0.14413	YES
0.133642	YES
0.129107	YES
0.137592	YES
0.112284	YES
0.1335	YES
0.140067	YES
0.131189	YES
0.124176	YES
0.125498	YES
0.159276	YES
0.104375	YES
0.145673	YES
0.112602	YES
0.126365	YES
0.110752	YES
0.136713	YES
0.138984	YES
0.14796	YES
0.137128	YES
0.123118	YES
0.135049	YES
0.113205	YES
0.123775	YES
0.10606	YES
0.106441	YES
0.122719	YES
0.108723	YES
0.164976	YES
0.106192	YES
0.126489	YES
0.14506	YES
0.127736	YES
0.134982	YES
0.125177	YES
0.129433	YES
0.136941	YES
0.130472	YES
0.15147	YES
0.16269	YES
0.163756	YES
0.132016	YES
0.132637	YES
0.127074	YES
0.12311	YES
0.110079	YES
0.135135	YES
0.098302	YES
0.104564	YES
0.140492	YES
0.112617	YES
0.13555	YES
0.135672	YES
0.141521	YES
0.127462	YES
0.102611	YES
0.114608	YES
0.118453	YES
0.129859	YES
0.105853	YES
0.0979711	YES
0.149816	YES
0.0981506	YES
0.145891	YES
0.15037	YES
0.107631	YES
0.145602	YES
0.134143	YES
0.121576	YES
0.116847	YES
0.110412	YES
0.123085	YES
0.134829	YES
0.123075	NO
0.134922	YES
0.168437	YES
0.117117	YES
0.125267	YES
0.116143	YES
0.146663	YES
0.0790484	YES
0.144518	YES
0.144171	YES
0.156118	YES
0.106345	YES
0.106815	YES
0.116634	YES
0.113792	YES
0.125481	YES
0.139293	YES
0.134684	YES
0.118176	YES
0.153608	YES
0.0997966	YES
0.133821	YES
0.135723	YES
0.124655	YES
0.165767	YES
0.123925	YES
0.0943783	NO
0.102614	NO
0.110395	NO
0.116256	NO
0.114874	NO
0.135232	NO
0.103985	NO
0.0827339	NO
0.106235	NO
0.137784	NO
0.112465	NO
0.13581	YES
0.133636	YES
0.116272	NO
0.0929398	YES
0.111814	YES
0.148913	YES
0.117872	YES
0.13803	YES
0.156881	YES
0.147625	YES
0.107074	YES
0.123132	YES
0.111421	YES
0.155383	YES
0.126462	YES
0.129151	YES
0.128454	YES
0.17906	YES
0.13622	YES
0.128865	YES
0.146247	YES
0.0871801	YES
0.130508	YES
0.13055	YES
0.0961693	YES
0.112485	YES
0.108051	YES
0.160966	YES
0.134734	YES
0.167032	YES
0.132014	YES
0.140841	YES
0.159845	YES
0.126326	YES
0.135421	YES
0.129812	YES
0.12014	YES
0.132777	YES
0.13884	YES
0.121852	YES
0.128712	YES
0.169545	YES
0.128142	YES
0.145299	YES
0.128722	YES
0.119694	YES
0.141357	YES
0.113098	YES
0.151336	YES
0.0938837	YES
0.104128	YES
0.0935534	YES
0.0960129	YES
0.116898	YES
0.145989	YES
0.144251	YES
0.117621	YES
0.139814	YES
0.148868	YES
0.132734	YES
0.105511	YES
0.143267	YES
0.146749	YES
0.133452	YES
0.113499	YES
0.146668	YES
0.123443	YES
0.154047	YES
0.115131	YES
0.110467	YES
0.137959	YES
0.105071	YES
0.120953	YES
0.113287	YES
0.104161	YES
0.0983731	YES
0.118025	YES
0.125677	YES
0.133456	YES
0.105053	YES
0.151362	YES
0.133654	YES
0.120977	YES
0.12545	YES
0.108241	YES
0.107715	YES
0.105864	YES
0.125011	YES
0.11664	YES
0.110355	YES
0.107507	YES
0.119334	YES
0.105591	YES
0.106188	YES
0.0940477	YES
0.103677	YES
0.124597	YES
0.11376	YES
0.122022	YES
0.126389	YES
0.134668	YES
0.138625	YES
0.127225	YES
0.126178	YES
0.147026	YES
0.105692	YES
0.150314	YES
0.123694	YES
0.128657	YES
0.134851	YES
0.111805	YES
0.125967	YES
0.155239	YES
0.132993	YES
0.151134	YES
0.137117	YES
0.123441	YES
0.134794	YES
0.120096	YES
0.129772	NO
0.125317	YES
0.15003	YES
0.139644	YES
0.144316	NO
0.140172	NO
0.138494	YES
0.125736	NO
0.147046	NO
0.124846	NO
0.124177	YES
0.124822	NO
0.144916	NO
0.122375	NO
0.0794117	YES
0.113118	YES
0.113149	NO
0.110096	NO
0.131418	NO
0.11885	YES
0.134955	YES
0.164852	YES
0.157046	YES
0.125988	YES
0.166622	YES
0.139007	YES
0.118537	YES
0.10803	YES
0.103812	YES
0.135586	YES
0.141653	YES
0.100699	YES
0.125536	YES
0.0922308	YES
0.133099	YES
0.140139	YES
0.116101	YES
0.138147	YES
0.138086	YES
0.153689	YES
0.15026	YES
0.133813	YES
0.12073	YES
0.122775	YES
0.132184	YES
0.148121	YES
0.144635	YES
0.123659	YES
0.161693	YES
0.144843	YES
0.149367	YES
0.146152	YES
0.00142613	NO
0.00303837	NO
0.000995452	NO
0.000332819	NO
0.00144632	NO
0.000603591	NO
0.000480529	NO
0.000374182	NO
0.120537	NO
0.112828	NO
0.121207	NO
0.140287	NO
0.152796	NO
0.133314	NO
0.14642	NO
0.155882	NO
0.158817	NO
0.157277	NO
0.151851	NO
0.163992	NO
0.160838	NO
0.138597	YES
0.144485	YES
0.136531	YES
0.11909	YES
0.142472	YES
0.147276	YES
0.128615	YES
0.145287	YES
0.145906	YES
0.132335	YES
0.111775	YES
0.123087	YES
0.126015	NO
0.123899	YES
0.132821	YES
0.154082	YES
0.142519	NO
0.0807257	NO
0.08183	NO
0.099806	NO
0.0816678	NO
0.122085	NO
0.127206	NO
0.122036	NO
0.148369	NO
0.116368	NO
0.164077	NO
0.131679	NO
0.131189	NO
0.125175	NO
0.104395	NO
0.125937	NO
0.128276	NO
0.117049	NO
0.121577	NO
0.109872	NO
0.100885	NO
0.171696	YES
0.134093	YES
0.111132	YES
0.110215	NO
0.0984103	NO
0.118698	NO
0.102734	NO
0.128636	NO
0.147756	YES
0.123007	YES
0.126927	YES
0.139695	NO
0.1187	NO
0.135126	NO
0.0971029	NO
0.132788	NO
0.149687	YES
0.130893	YES
0.130044	YES
0.111407	NO
0.111021	NO
0.102557	NO
0.129557	NO
0.115277	NO
0.165773	YES
0.135779	YES
0.135096	YES
0.116391	NO
0.109468	NO
0.121586	NO
0.0732441	NO
0.123466	NO
0.159033	YES
0.127422	YES
0.134431	YES
0.0743652	NO
0.0974971	NO
0.119405	NO
0.091717	NO
0.116351	NO
0.136157	YES
0.120851	YES
0.0958967	YES
0.119404	YES
0.110831	NO
0.111588	NO
0.118688	NO
0.134608	NO
0.155275	YES
0.132167	YES
0.127427	YES
0.132344	YES
0.147567	YES
0.14274	NO
0.10217	YES
0.10442	YES
0.106447	YES
0.130787	YES
0.128084	NO
0.132465	NO
0.106138	NO
0.0927171	NO
0.109577	YES
0.160644	YES
0.101725	YES
0.133311	YES
0.117429	YES
0.148991	NO
0.112588	YES
0.119138	YES
0.081966	YES
0.100411	YES
0.0953392	NO
0.0937421	NO
0.117054	NO
0.110853	NO
0.148771	YES
0.125065	YES
0.145604	YES
0.141261	YES
0.135702	YES
0.12135	NO
0.1003	YES
0.0703322	YES
0.0890379	YES
0.109012	YES
0.146083	NO
0.126031	NO
0.121791	NO
0.0982729	NO
0.132456	YES
0.161453	YES
0.111374	YES
0.141429	YES
0.121886	YES
0.137371	NO
0.127985	YES
0.10088	YES
0.0784487	YES
0.143152	YES
0.128606	NO
0.157301	NO
0.137769	NO
0.13489	NO
0.121687	YES
0.127438	YES
0.133557	YES
0.137506	YES
0.160222	YES
0.128768	YES
0.118708	YES
0.113228	YES
0.112535	YES
0.0780702	YES
0.0778845	YES
0.107174	NO
0.116366	NO
0.1262	NO
0.133156	NO
0.0991219	NO
0.133429	NO
0.135103	NO
0.165096	YES
0.104591	YES
0.138883	YES
0.114774	YES
0.0902632	YES
0.124472	YES
0.122232	YES
0.119702	YES
0.140432	YES
0.143421	YES
0.108925	YES
0.143817	YES
0.154206	NO
0.140045	NO
0.150771	NO
0.153092	NO
0.146328	NO
0.148627	NO
0.118668	NO
0.139377	NO
0.133712	NO
0.128747	NO
0.137057	NO
0.140495	NO
0.149696	YES
0.143512	NO
0.118354	NO
0.157276	NO
0.13361	NO
0.145839	NO
0.134351	NO
0.167883	YES
0.137292	NO
0.14067	NO
0.149599	NO
0.143652	NO
0.153915	NO
0.133162	NO
0.154179	YES
0.146383	YES
0.121282	YES
0.146866	YES
0.160073	YES
0.131851	NO
0.166911	NO
0.127894	NO
0.130298	NO
0.144413	NO
0.139438	NO
0.110709	YES
0.122515	YES
0.123675	YES
0.0933809	YES
0.106223	NO
0.100549	NO
0.112435	NO
0.105772	NO
0.10265	NO
0.109909	NO
0.121215	YES
0.113972	YES
0.112286	YES
0.128764	YES
0.12226	YES
0.115131	NO
0.0855096	NO
0.130473	NO
0.13151	NO
0.142771	NO
0.117939	NO
0.112104	YES
0.139584	YES
0.148863	YES
0.139046	YES
0.104791	YES
0.134231	NO
0.113289	NO
0.141793	NO
0.124867	NO
0.118357	NO
0.103012	NO
0.151489	YES
0.156947	YES
0.152315	YES
0.114492	YES
0.148765	YES
0.180906	YES
0.144246	NO
0.134676	NO
0.121736	NO
0.0966558	NO
0.125815	NO
0.12429	NO
0.117763	YES
0.101074	YES
0.148099	YES
0.121239	YES
0.125132	YES
0.121395	YES
0.13023	YES
0.114428	NO
0.1155	NO
0.141722	NO
0.148011	NO
0.121242	NO
0.126834	NO
0.117908	YES
0.130281	YES
0.160206	YES
0.133565	YES
0.110019	YES
0.11076	YES
0.123868	YES
0.118511	NO
0.103909	NO
0.116233	NO
0.100148	NO
0.124447	NO
0.125705	NO
0.122163	YES
0.109493	YES
0.149152	YES
0.110737	YES
0.151795	YES
0.139161	YES
0.119601	YES
0.118081	NO
0.106311	NO
0.118084	NO
0.104067	NO
0.103858	NO
0.105232	NO
0.135204	YES
0.103845	YES
0.141827	YES
0.131214	YES
0.13739	YES
0.139164	YES
0.0999446	YES
0.12534	NO
0.124517	NO
0.13693	NO
0.139161	NO
0.137545	NO
0.124108	NO
0.163815	NO
0.144119	NO
0.111534	NO
0.140541	NO
0.14887	NO
0.140571	NO
0.124122	NO
0.151671	NO
0.120382	NO
0.1156	NO
0.142728	NO
0.111034	NO
0.10117	NO
0.114373	NO
0.0922126	NO
0.12047	NO
0.0950121	NO
0.109805	NO
0.105421	YES
0.154691	YES
0.117535	YES
0.140947	YES
0.0882592	YES
0.133159	YES
0.130718	YES
0.112828	YES
0.124292	YES
0.094146	YES
0.127566	YES
0.131586	YES
0.138227	NO
0.105735	NO
0.118912	NO
0.127314	NO
0.116903	NO
0.124781	NO
0.117014	NO
0.117268	YES
0.119764	YES
0.113319	YES
0.162853	YES
0.125213	YES
0.130975	YES
0.161487	YES
0.115211	YES
0.138088	YES
0.132663	YES
0.138793	YES
0.129952	YES
0.105038	NO
0.0958754	NO
0.121824	NO
0.119178	NO
0.0996409	NO
0.0984891	NO
0.0750047	NO
0.0980751	YES
0.105947	YES
0.106505	YES
0.112825	YES
0.102486	YES
0.158076	YES
0.155435	YES
0.125653	YES
0.137825	YES
0.0960284	YES
0.147513	YES
0.118707	YES
0.105104	NO
0.153119	YES
0.120009	YES
0.13311	YES
0.13507	YES
0.11103	NO
0.135498	NO
0.13815	NO
0.136124	NO
0.118515	NO
0.0949636	NO
0.113003	YES
0.149765	YES
0.123372	YES
0.125546	YES
0.123301	YES
0.137194	YES
0.140153	YES
0.140737	YES
0.131625	YES
0.138772	YES
0.0935738	NO
0.128925	NO
0.11791	NO
0.129366	NO
0.161504	NO
0.154093	NO
0.150262	NO
0.116164	NO
0.149693	NO
0.11853	NO
0.095935	NO
0.133525	NO
0.182027	NO
0.164125	NO
0.104867	YES
0.0905912	YES
0.0884093	YES
0.116962	NO
0.151806	NO
0.10406	NO
0.110143	NO
0.156711	NO
0.146961	NO
0.168321	NO
0.13133	NO
0.129093	NO
0.138218	NO
0.0996776	NO
0.139492	NO
0.128878	NO
0.147057	YES
0.165392	YES
0.137609	YES
0.127282	YES
0.121763	YES
0.165814	YES
0.109117	YES
0.126961	YES
0.14221	YES
0.119317	YES
0.111409	NO
0.15024	YES
0.128849	YES
0.120381	YES
0.123896	YES
0.114254	YES
0.12643	YES
0.109775	YES
0.0740421	YES
0.0929181	YES
0.117259	YES
0.0918605	YES
0.139546	YES
0.125154	YES
0.115911	YES
0.115466	YES
0.0949552	YES
0.112186	YES
0.146581	YES
0.118137	YES
0.10022	YES
0.135407	NO
0.114981	NO
0.199641	NO
0.147375	NO
0.136582	NO
0.116551	NO
0.173049	NO
0.166978	NO
0.162813	NO
0.106662	NO
0.141518	NO
0.126718	NO
0.148222	NO
0.140238	NO
0.142722	NO
0.0908222	NO
0.126218	NO
0.106894	NO
0.152643	NO
0.184655	NO
0.124153	NO
0.157504	NO
0.169088	NO
0.146191	NO
0.133208	NO
0.12954	NO
0.11352	NO
0.125505	NO
0.137435	NO
0.136544	NO
0.150156	YES
0.12989	YES
0.127592	YES
0.124377	YES
0.085517	YES
0.127472	YES
0.115734	YES
0.106021	YES
0.116884	YES
0.108193	YES
0.116344	YES
0.127404	YES
0.128671	YES
0.114841	YES
0.108465	YES
0.124346	YES
0.152449	YES
0.112928	YES
0.132431	NO
0.110566	NO
0.130195	NO
0.164827	NO
0.12331	YES
0.108758	YES
0.098777	YES
0.134119	YES
0.139336	YES
0.132637	YES
0.116737	YES
0.102929	YES
0.134551	YES
0.1006	YES
0.121171	NO
0.130951	NO
0.171499	NO
0.103593	YES
0.128614	YES
0.14478	YES
0.167027	YES
0.113749	YES
0.109611	YES
0.114275	YES
0.106136	YES
0.1191	YES
0.113155	YES
0.109046	YES
0.108497	YES
0.1065	YES
0.111659	YES
0.115098	YES
0.119745	YES
0.125224	YES
0.143201	YES
0.149308	YES
0.116972	YES
0.116456	YES
0.170287	YES
0.114364	YES
0.104894	YES
0.125988	YES
0.148567	YES
0.146563	YES
0.125573	YES
0.131771	YES
0.122907	YES
0.124047	YES
0.112621	YES
0.130146	YES
0.15823	YES
0.141611	YES
0.129851	YES
0.119196	YES
0.123426	YES
0.124257	YES
0.115018	YES
0.0936824	YES
0.121814	YES
0.103435	YES
0.136243	YES
0.124617	YES
0.127286	YES
0.135466	YES
0.111665	YES
0.100533	YES
0.121811	YES
0.128986	YES
0.113433	YES
0.102196	YES
0.126216	YES
0.135087	YES
0.164927	YES
0.119101	YES
0.0992958	YES
0.144586	YES
0.145411	YES
0.127332	YES
0.132707	YES
0.134391	YES
0.152272	YES
0.150466	YES
0.103288	YES
0.127976	YES
0.14444	YES
0.137701	YES
0.147907	YES
0.137898	YES
0.110208	YES
0.0911288	YES
0.153541	YES
0.0995479	YES
0.13654	YES
0.138332	YES
0.127829	YES
0.108139	YES
0.138663	NO
0.101174	NO
0.102029	NO
0.117362	NO
0.13543	NO
0.113507	NO
0.114345	NO
0.1314	NO
0.129035	NO
0.127655	NO
0.105907	NO
0.175386	NO
0.191821	NO
0.125254	NO
0.12661	NO
0.136344	NO
0.113493	NO
0.130373	NO
0.158911	NO
0.122086	NO
0.103351	NO
0.120731	NO
0.129166	NO
0.13252	NO
0.111895	NO
0.178259	NO
0.159293	NO
0.115582	NO
0.109981	YES
0.161844	YES
0.123187	YES
0.149113	YES
0.137159	YES
0.0833267	YES
0.105978	YES
0.158712	YES
0.093326	YES
0.118192	YES
0.126498	YES
0.123927	YES
0.123472	YES
0.0989334	NO
[truncated: 3,385 more rows]

## Sheet: SAMAFS First cous 1R IBD frac
Fraction genome IBD	Validated?
0.0629971	YES
0.0591722	YES
0.0660747	YES
0.0841453	YES
0.0484591	YES
0.0591062	YES
0.0507368	YES
0.0610443	YES
0.0387273	YES
0.0528715	YES
0.11386	YES
0.0922443	YES
0.0807346	YES
0.0741991	YES
0.0694706	YES
0.0813546	YES
0.0894624	NO
0.0815642	NO
0.0869845	NO
0.0666348	NO
0.0752001	NO
0.065103	NO
0.0529443	NO
0.0880563	NO
0.0739905	NO
0.0773282	NO
0.0703794	NO
0.0992939	NO
0.0624716	YES
0.0464683	YES
0.0459111	YES
0.065154	YES
0.0436277	NO
0.0495603	NO
0.0508044	NO
0.0380823	NO
0.0742404	NO
0.0674103	NO
0.094388	NO
0.0822361	NO
0.0687511	NO
0.054682	NO
0.0984274	NO
0.0792532	NO
0.0667455	NO
0.0553224	NO
0.0894262	NO
0.082051	NO
0.0912355	NO
0.0698221	NO
0.066195	NO
0.0530416	NO
0.0901355	NO
0.0639997	NO
0.0998417	NO
0.0756725	NO
0.0869586	NO
0.0672134	NO
0.0498623	NO
0.0637599	NO
0.0637451	NO
0.0679011	NO
0.0542587	NO
0.0480223	NO
0.0596595	NO
0.0543984	NO
0.0577702	NO
0.0601958	NO
0.0627113	NO
0.0612933	NO
0.0691629	NO
0.0555786	NO
0.0665371	NO
0.0551668	NO
0.0579684	NO
0.0511397	NO
0.0458288	NO
0.0503697	NO
0.0654537	NO
0.0579578	NO
0.0461892	NO
0.0514713	NO
0.0349361	NO
0.0502061	NO
0.043874	NO
0.0546846	NO
0.0468546	NO
0.0531067	NO
0.0467686	NO
0.0576013	NO
0.0644604	NO
0.0547185	NO
0.0545447	NO
0.0587381	NO
0.0771386	NO
0.062842	NO
0.0678938	NO
0.072474	NO
0.0567503	NO
0.0603444	NO
0.0738314	NO
0.0798476	NO
0.0593111	NO
0.0481548	NO
0.0584322	NO
0.0669415	NO
0.0598129	NO
0.0687011	NO
0.0788959	NO
0.0608276	NO
0.0599982	NO
0.065047	NO
0.0842213	NO
0.0703439	NO
0.0833243	NO
0.080168	NO
0.0988315	NO
0.0888905	NO
0.0933768	NO
0.0948327	NO
0.077141	NO
0.0915503	NO
0.0996613	NO
0.0997762	NO
0.0414286	NO
0.0463474	NO
0.0336393	NO
0.0503358	NO
0.0507112	NO
0.0504153	NO
0.0580634	NO
0.0395007	NO
0.0485821	NO
0.0508295	NO
0.0664203	NO
0.063227	NO
0.072714	NO
0.0544284	NO
0.0750237	NO
0.0632511	NO
0.0749753	NO
0.0737347	NO
0.0643554	NO
0.0640558	NO
0.0712614	NO
0.0738269	NO
0.0691901	NO
0.064153	NO
0.062848	NO
0.0924057	NO
0.0689907	NO
0.0890949	NO
0.0695497	NO
0.0679675	NO
0.0658346	NO
0.0873229	NO
0.0758548	NO
0.0578228	NO
0.0611306	NO
0.0568331	NO
0.0771336	NO
0.0684175	NO
0.0774095	NO
0.0814888	NO
0.0511996	NO
0.0620556	NO
0.0655765	NO
0.0789565	NO
0.0624717	NO
0.0641615	NO
0.0635104	NO
0.093773	NO
0.0670315	NO
0.0856566	NO
0.0658374	NO
0.0650814	NO
0.049668	NO
0.0736254	NO
0.0711932	NO
0.0616854	NO
0.0697301	NO
0.0731242	NO
0.0810257	NO
0.0824314	NO
0.0773878	NO
0.0820005	NO
0.0633671	NO
0.0569395	NO
0.0674743	NO
0.0755383	NO
0.0859091	NO
0.077085	NO
0.0745355	NO
0.0646991	NO
0.071401	NO
0.0557297	NO
0.0537272	NO
0.0471154	NO
0.0783288	NO
0.0708229	NO
0.0794276	NO
0.0584731	NO
0.104423	NO
0.0888073	NO
0.1021	NO
0.0733414	NO
0.0934548	NO
0.0772331	NO
0.0855491	NO
0.0572758	NO
0.0649554	NO
0.0579219	NO
0.0488932	NO
0.0612487	NO
0.0659141	NO
0.065031	NO
0.068187	NO
0.0629536	NO
0.0808991	NO
0.0622711	NO
0.0649846	NO
0.0557167	NO
0.0494913	NO
0.0432547	NO
0.0564343	NO
0.0452672	NO
0.0632089	NO
0.0669713	NO
0.0811628	NO
0.0473842	NO
0.0619808	NO
0.0637574	NO
0.0702803	NO
0.055651	NO
0.0454585	NO
0.0458019	NO
0.0655575	NO
0.047563	NO
0.0626501	NO
0.0689773	NO
0.0808139	NO
0.102097	NO
0.0607907	NO
0.0499174	NO
0.0443949	NO
0.0477416	NO
0.0504472	NO
0.0470146	NO
0.0854171	NO
0.116201	NO
0.0731912	NO
0.0822043	NO
0.0694213	NO
0.0831657	NO
0.0885692	NO
0.0872278	NO
0.0514638	NO
0.0635333	NO
0.0514079	NO
0.0828726	NO
0.058681	YES
0.0525028	YES
0.0511781	YES
0.0603584	YES
0.0586029	YES
0.0576658	YES
0.0808849	YES
0.0750172	YES
0.0711702	YES
0.0597174	YES
0.0882734	YES
0.0674398	YES
0.0891883	YES
0.0759235	YES
0.0605106	YES
0.0602476	YES
0.0375741	YES
0.0679888	YES
0.042988	YES
0.0606695	YES
0.05942	YES
0.05942	YES
0.0678885	YES
0.0693693	YES
0.0851598	YES
0.0732726	YES
0.062761	YES
0.049051	YES
0.0452459	YES
0.0770635	YES
0.0654657	YES
0.0512788	YES
0.0516725	YES
0.0516725	YES
0.0753443	YES
0.065379	YES
0.0724561	YES
0.0643639	YES
0.0732179	YES
0.074655	YES
0.113515	YES
0.0480613	YES
0.0792469	YES
0.0463526	YES
0.0725243	YES
0.0705162	YES
0.066814	YES
0.0641276	YES
0.0741557	YES
0.0678259	YES
0.0788657	YES
0.0609598	YES
0.0625513	YES
0.0512098	YES
0.0735782	YES
0.0668123	YES
0.0697691	YES
0.0442933	YES
0.0693798	YES
0.0617385	YES
0.0754771	YES
0.0434652	YES
0.0706161	YES
0.0605431	YES
0.0605047	YES
0.06467	YES
0.065694	YES
0.0681352	YES
0.0613209	YES
0.085011	YES
0.0673324	YES
0.0440949	YES
0.0610522	YES
0.0563319	YES
0.0753502	YES
0.059137	YES
0.0584602	YES
0.0628685	YES
0.0821716	YES
0.0699992	YES
0.0956093	YES
0.0853201	YES
0.0868602	YES
0.0692861	YES
0.0535254	YES
0.0481228	YES
0.0536866	YES
0.0598703	YES
0.065645	YES
0.0503408	YES
0.0558176	YES
0.0427738	YES
0.0720185	YES
0.0517329	YES
0.0601519	YES
0.0458561	YES
0.0523117	YES
0.0481055	YES
0.0586953	YES
0.0437207	YES
0.0499643	YES
0.0559441	NO
0.0487875	NO
0.0749141	NO
0.0765733	NO
0.0560825	NO
0.0650233	NO
0.0687921	NO
0.068388	NO
0.0794278	NO
0.0833677	NO
0.0644998	NO
0.0682696	NO
0.065673	NO
0.0661993	NO
0.0762952	NO
0.0879332	NO
0.0498115	NO
0.0588352	NO
0.0611855	NO
0.0865839	NO
0.0822819	NO
0.0848503	NO
0.0811824	NO
0.0635006	NO
0.0732079	NO
0.0831965	NO
0.0735929	NO
0.110674	NO
0.0787506	NO
0.0691398	NO
0.0566911	NO
0.0547227	NO
0.0808676	NO
0.0785021	NO
0.0592064	NO
0.0559839	NO
0.0749313	YES
0.0724029	YES
0.0810852	YES
0.0623095	YES
0.0822358	YES
0.0934721	YES
0.0650989	NO
0.0777986	NO
0.0645606	YES
0.0646706	YES
0.0720259	YES
0.0505665	YES
0.069126	YES
0.0677104	YES
0.0634561	NO
0.0738159	NO
0.0469104	YES
0.0654309	YES
0.0695733	YES
0.0483787	YES
0.0630928	YES
0.0529013	YES
0.0466526	NO
0.0602696	NO
0.0637233	NO
0.0653473	NO
0.0784089	NO
0.0590101	NO
0.0603848	NO
0.0669674	NO
0.0915751	NO
0.0587881	NO
0.0645565	NO
0.0743919	NO
0.0676639	NO
0.0808527	NO
0.0738243	NO
0.0996515	NO
0.0394026	NO
0.0731211	NO
0.0616531	NO
0.068611	NO
0.0746606	NO
0.0679147	NO
0.090433	NO
0.0506681	NO
0.0488453	NO
0.0724241	NO
0.0660074	NO
0.0686381	NO
0.0536302	NO
0.0470265	NO
0.0511678	NO
0.0551812	NO
0.073063	NO
0.0611602	NO
0.0593005	NO
0.0691521	NO
0.0487429	NO
0.0585606	NO
0.0563678	NO
0.0505252	NO
0.0604138	NO
0.0564806	NO
0.0651942	NO
0.0597248	NO
0.052137	NO
0.0609196	NO
0.0704975	NO
0.0604192	NO
0.0488294	NO
0.0497254	NO
0.0691062	NO
0.0480246	NO
0.0558545	NO
0.0669877	NO
0.0437768	NO
0.062628	NO
0.062304	NO
0.0564318	NO
0.0760452	YES
0.0705316	YES
0.0837383	YES
0.0682585	NO
0.0664646	NO
0.084656	NO
0.0568009	NO
0.0828687	NO
0.0840089	NO
0.0674263	NO
0.0844216	YES
0.0777662	YES
0.105762	YES
0.0815973	NO
0.0973986	NO
0.0604319	NO
0.05403	NO
0.061293	NO
0.0601932	NO
0.0424305	NO
0.10424	NO
0.095795	NO
0.0928355	NO
0.0695036	NO
0.0852635	NO
0.0861302	NO
0.0588124	NO
0.096801	NO
0.101825	NO
0.0789417	NO
0.0640618	NO
0.0790938	NO
0.0898826	NO
0.0590194	NO
0.0925452	NO
0.112294	NO
0.10733	NO
0.0713579	NO
0.0862886	NO
0.0872053	NO
0.0529459	NO
0.0770605	NO
0.0733439	NO
0.0597585	NO
0.0437032	NO
0.057646	NO
0.0539462	NO
0.0304105	NO
0.0656499	NO
0.0937527	NO
0.0925905	NO
0.069564	NO
0.07672	NO
0.0704086	NO
0.057279	NO
0.0854303	NO
0.0956246	NO
0.0827385	NO
0.0632872	NO
0.0861091	NO
0.0937081	NO
0.0616784	NO
0.066074	NO
0.0750533	NO
0.0609937	NO
0.0720777	NO
0.0673701	NO
0.0661085	NO
0.0465896	NO
0.0657868	NO
0.0518347	NO
0.0570111	NO
0.0522678	NO
0.0687282	NO
0.0655825	NO
0.0476854	NO
0.0691202	NO
0.0696051	NO
0.0745854	NO
0.0460606	NO
0.0351042	NO
0.0510071	NO
0.0636508	NO
0.0618748	NO
0.0559619	NO
0.0544249	NO
0.0515452	NO
0.0553866	NO
0.0617041	NO
0.0598909	NO
0.0625432	YES
0.0516384	YES
0.0673158	YES
0.0473853	YES
0.0653602	NO
0.0402376	YES
0.0599519	YES
0.0412368	YES
0.0836556	YES
0.0461524	YES
0.058405	YES
0.0548718	YES
0.0418782	YES
0.0707044	YES
0.0473304	YES
0.0639557	YES
0.0550242	NO
0.0308309	YES
0.0522011	NO
0.0385117	YES
0.0632645	YES
0.0439721	YES
0.0672279	YES
0.0576308	YES
0.0402108	YES
0.0418573	NO
0.0443998	YES
0.0548201	NO
0.0310292	YES
0.0580761	NO
0.0290887	YES
0.0340682	YES
0.0485911	YES
0.043493	YES
0.0448266	YES
0.0475138	YES
0.0340682	YES
0.0485911	YES
0.043493	YES
0.0448266	YES
0.0475138	YES
0.0566867	NO
0.0477697	YES
0.094223	YES
0.0715111	YES
0.0600771	YES
0.0768764	YES
0.0768764	YES
0.0484767	YES
0.0449216	YES
0.0439974	YES
0.0417765	YES
0.0503704	YES
0.0441531	YES
0.0746865	YES
0.0908733	YES
0.0800634	YES
0.0689109	YES
0.0380669	YES
0.0457391	YES
0.0514228	YES
0.078198	YES
0.0643917	YES
0.0692946	YES
0.0549501	YES
0.0655525	YES
0.0776756	YES
0.0745134	YES
0.0935062	YES
0.0835166	YES
0.0622009	YES
0.0636707	YES
0.0691304	YES
0.0749022	YES
0.0759728	YES
0.073136	YES
0.0553394	YES
0.0585598	YES
0.0739148	YES
0.0571474	YES
0.0530196	YES
0.0597487	YES
0.0601488	YES
0.0514052	YES
0.0521178	YES
0.0633706	YES
0.0509173	YES
0.0578545	YES
0.070923	YES
0.0754812	YES
0.090688	YES
0.0707042	YES
0.0603799	YES
0.0620554	YES
0.0483421	YES
0.0709778	YES
0.0779758	YES
0.0842662	YES
0.0873628	YES
0.0575299	YES
0.0541856	YES
0.0335474	YES
0.0358714	YES
0.0451796	YES
0.0518515	YES
0.042215	YES
0.0518676	YES
0.032615	YES
0.043722	YES
0.0521544	YES
0.0510714	YES
0.0670754	YES
0.0518918	YES
0.0558206	YES
0.058637	YES
0.0479037	YES
0.0545768	YES
0.0657163	YES
0.0774721	YES
0.0650618	YES
0.0647978	YES
0.047304	YES
0.0501734	YES
0.0681121	YES
0.0829692	YES
0.0733262	YES
0.0797966	YES
0.0446559	YES
0.0649836	YES
0.0546064	YES
0.072145	YES
0.0778869	YES
0.099065	YES
0.068596	YES
0.078121	YES
0.0624158	YES
0.0507232	YES
0.0407205	YES
0.0537332	YES
0.0546534	YES
0.0702671	YES
0.0598552	YES
0.0460644	YES
0.0431741	YES
0.0524606	YES
0.0821008	YES
0.0462677	YES
0.0427188	YES
0.0502569	YES
0.059649	YES
0.0626425	YES
0.087406	YES
0.0540717	YES
0.0621778	YES
0.0550595	YES
0.0735553	YES
0.0636795	YES
0.0704498	YES
0.0477319	YES
0.0675939	YES
0.0603129	YES
0.0551678	YES
0.0721195	YES
0.0676196	YES
0.0521149	YES
0.0734138	YES
0.0730102	YES
0.0749225	YES
0.0629948	YES
0.0505682	YES
0.0633389	YES
0.0614639	YES
0.0550567	YES
0.0718923	YES
0.0502431	YES
0.056801	YES
0.0599294	YES
0.0646068	YES
0.0541183	YES
0.0581194	YES
0.0486028	YES
0.0572873	YES
0.0663604	YES
0.0670474	YES
0.0796017	YES
0.0715584	YES
0.0724119	YES
0.0639984	YES
0.0841301	YES
0.0821936	YES
0.0794351	YES
0.0532943	YES
0.0625271	YES
0.0665825	YES
0.0488486	NO
0.0669368	NO
0.0523926	NO
0.0617197	NO
0.0651029	NO
0.0485783	NO
0.073089	NO
0.0509134	NO
0.0684944	NO
0.073389	NO
0.0426039	NO
0.0591783	NO
0.0365804	NO
0.0446288	NO
0.0535911	NO
0.0531235	NO
0.0613983	NO
0.0334159	NO
0.052788	NO
0.0460217	NO
0.0675017	NO
0.048736	NO
0.0743104	NO
0.0509743	NO
0.0575553	NO
0.0488465	NO
0.0464909	NO
0.0450931	NO
0.0694175	NO
0.0554793	NO
0.0721424	NO
0.0675863	NO
0.0690804	NO
0.0508086	NO
0.0607077	NO
0.0509942	NO
0.0454442	NO
0.0555985	NO
0.0620442	NO
0.0660274	NO
0.0742745	NO
0.0592985	NO
0.0530431	NO
0.079035	NO
0.0485348	NO
0.0693699	NO
0.0570454	NO
0.0361152	NO
0.0539489	NO
0.088244	NO
0.0862752	YES
0.067213	NO
0.0854582	NO
0.069546	NO
0.0642624	YES
0.056646	NO
0.0598586	NO
0.0594442	YES
0.0842189	YES
0.0632175	YES
0.063919	YES
0.0583632	YES
0.0586027	YES
0.0675542	YES
0.0665118	YES
0.0637524	YES
0.0746894	NO
0.0474013	YES
0.0747234	NO
0.0810258	NO
0.0555881	NO
0.0493505	YES
0.033527	NO
0.0624534	NO
0.0709038	NO
0.0465822	YES
0.0671101	NO
0.0556806	NO
0.047738	YES
0.0532742	YES
0.0366643	YES
0.050588	NO
0.0723192	YES
0.0498293	NO
0.0422595	NO
0.0424475	YES
0.0514016	YES
0.0431116	YES
0.0606268	NO
0.0685664	YES
0.0449982	NO
0.0434017	NO
0.0501705	YES
0.0542519	YES
0.0506283	YES
0.0736382	NO
0.0461209	YES
0.0665807	NO
0.0599204	NO
0.0466576	YES
0.0558571	YES
0.0512243	YES
0.0481159	NO
0.0442195	YES
0.040428	NO
0.0442728	NO
0.0458446	YES
0.0384283	YES
0.0311157	YES
0.0528351	NO
0.0722502	YES
0.0608109	NO
0.046086	NO
0.0627687	YES
0.0634597	YES
0.0668503	YES
0.0712953	YES
0.0726785	YES
0.0760028	YES
0.0690142	YES
0.055412	YES
0.0639438	YES
0.0727611	YES
0.0628133	YES
0.0557095	YES
0.0540922	YES
0.0592323	YES
0.0537364	YES
0.0558906	YES
0.0670859	YES
0.0620311	YES
0.0583418	YES
0.083721	YES
0.0673313	YES
0.0675086	YES
0.0547433	YES
0.0662903	YES
0.0553392	YES
0.054226	YES
0.0703443	YES
0.0619455	NO
0.0468172	YES
0.0492153	NO
0.0648706	NO
0.0756841	YES
0.0528125	YES
0.0572133	YES
0.043724	YES
0.060062	YES
0.044153	YES
0.0363725	YES
0.0356501	YES
0.0200439	YES
0.029841	YES
0.0340334	YES
0.0416424	YES
0.0421283	YES
0.0343777	YES
0.0302971	YES
0.0597658	YES
0.0505455	NO
0.05616	YES
0.0537482	NO
0.0404027	NO
0.0556481	YES
0.0601459	YES
0.0665489	YES
0.0310413	YES
0.0513452	NO
0.0607724	YES
0.0553313	NO
0.0562558	NO
0.0465829	YES
0.0412428	YES
0.052301	YES
0.0234518	YES
0.0671219	NO
0.0648697	YES
0.0624095	NO
0.0610425	NO
0.0506843	YES
0.0551708	YES
0.0594437	YES
0.0291948	YES
0.0432076	NO
0.0756769	YES
0.0441405	NO
0.0359169	NO
0.0656347	YES
0.0637884	YES
0.0815524	YES
0.0320514	YES
0.0512236	NO
0.0430883	NO
0.0447544	NO
0.0505421	NO
0.0402228	NO
0.0483453	NO
0.0386423	NO
0.0474976	NO
0.0438631	NO
0.0307173	NO
0.0469663	NO
0.0497104	NO
0.0712817	NO
0.0586194	NO
0.0470481	NO
0.0458738	NO
0.0435548	NO
0.0410616	NO
0.0504558	NO
0.0636785	YES
0.0666613	NO
0.0692863	NO
0.0649104	YES
0.0678855	YES
0.0574558	YES
0.0804903	YES
0.0602344	YES
0.0289216	YES
0.0476019	NO
0.0605873	NO
0.0602921	NO
0.0569748	NO
0.04997	NO
0.0507296	NO
0.0521794	NO
0.0480719	NO
0.0934936	NO
0.0765635	NO
0.0754005	NO
0.0547533	NO
0.0403744	NO
0.0538369	NO
0.0558394	NO
0.0454612	NO
0.0307984	NO
0.0645321	NO
0.0419839	NO
0.06034	NO
0.0544366	YES
0.0629483	NO
0.0648516	NO
0.0643416	YES
0.0680186	YES
0.0499994	YES
0.0891703	YES
0.0754536	YES
0.0344417	YES
0.043647	NO
0.049954	NO
0.0585597	YES
0.0517652	NO
0.0590547	NO
0.069245	YES
0.0715985	YES
0.0543187	YES
0.050638	YES
0.0678305	YES
0.0293687	YES
0.0415232	NO
0.0288917	NO
0.0403622	YES
0.0391578	NO
0.0497321	NO
0.0809647	YES
0.0793357	YES
0.0563219	YES
0.079201	YES
0.0629439	YES
0.0220167	YES
0.0362153	NO
0.0339106	NO
0.0559985	YES
0.0439289	NO
0.0531332	NO
0.0824792	YES
0.0734044	YES
0.0695129	YES
0.0654434	YES
0.0582042	YES
0.0275027	YES
0.0348174	NO
0.0585746	NO
0.0565935	YES
0.070207	NO
0.0648615	NO
0.0742276	YES
0.0723281	YES
0.0617061	YES
0.0710952	YES
0.0781134	YES
0.0418819	YES
0.0574389	NO
0.0685235	NO
0.0550899	YES
0.0605811	NO
0.0567625	NO
0.0716681	YES
0.0844514	YES
0.0660674	YES
0.0936852	YES
0.0656446	YES
0.0466056	YES
0.0648897	NO
0.0358121	NO
0.0769461	YES
0.0642735	YES
0.0833666	YES
0.0751721	YES
0.0719988	YES
0.0761844	YES
0.0589032	YES
0.0638213	YES
0.0644287	YES
0.0799908	YES
0.0918442	YES
0.0648263	YES
0.0622433	YES
0.0537411	YES
0.0538717	YES
0.0702386	YES
0.051688	YES
0.0722195	YES
0.0612825	YES
0.0488832	NO
0.0802973	YES
0.049574	NO
0.043664	NO
0.0695767	YES
0.0759083	YES
0.0783947	YES
0.0626317	YES
0.0682607	YES
0.034603	YES
0.044904	NO
0.0586641	NO
0.0792027	YES
0.0679478	NO
0.057774	NO
0.0618636	NO
0.0654806	NO
0.0591405	NO
0.0619784	NO
0.0494857	NO
0.0534663	NO
0.0519191	NO
0.0406745	NO
0.0547307	NO
0.0536145	NO
0.0622456	NO
0.0757313	NO
0.0404754	NO
0.0518754	NO
0.0571855	NO
0.0414632	NO
0.0645697	NO
0.0618071	NO
0.0524865	NO
0.044051	NO
0.0475021	NO
0.063038	NO
0.0693641	NO
0.0499557	NO
0.0618525	YES
0.0516469	YES
0.0474282	YES
0.0553675	YES
0.0755013	YES
0.073537	YES
0.0689292	YES
0.0750021	YES
0.0545024	YES
0.0392429	YES
0.0519506	YES
0.0717657	YES
0.0765253	YES
0.0645897	YES
0.0747196	YES
0.0690805	YES
0.0811037	YES
0.0547952	YES
0.0564675	YES
0.0927797	YES
0.0625754	YES
0.0736782	YES
0.0810929	YES
0.0837092	YES
0.0773812	YES
0.0897896	YES
0.0909021	YES
0.0625262	YES
0.0519648	YES
0.0645483	YES
0.0777134	YES
0.0888322	YES
0.0920621	YES
0.079247	YES
0.0700752	YES
0.0600428	YES
0.0649712	YES
0.078467	YES
0.0604884	YES
0.0743444	YES
0.0830043	YES
0.0501888	YES
0.0447723	YES
0.0584423	YES
0.0393258	YES
0.0491179	YES
0.0653009	YES
0.0540665	YES
0.0544769	YES
0.0427177	YES
0.0300621	YES
0.0239426	YES
0.0371378	YES
0.0738683	YES
0.0552926	YES
0.0406033	YES
0.0567255	YES
0.0681781	YES
0.0798495	YES
0.0636474	YES
0.0764347	YES
0.0686811	YES
0.0515231	YES
0.0670652	YES
0.0529825	YES
0.0499307	YES
0.0458528	YES
0.0562109	YES
0.048435	YES
0.0612527	YES
0.0491487	YES
0.0428594	YES
0.0438832	YES
0.0574448	YES
0.0965876	YES
0.076893	YES
0.0463717	YES
0.0643753	YES
0.0847952	YES
0.0850409	YES
0.0817127	YES
0.0958861	YES
0.0619609	YES
0.0695162	NO
0.0517531	YES
0.0684494	NO
0.0656133	NO
0.0580392	YES
0.0549435	YES
0.0642019	YES
0.0426525	YES
0.0495744	YES
0.0562846	YES
0.0538656	NO
0.0540494	NO
0.0799888	YES
0.0861749	NO
0.0698735	YES
0.0850983	YES
0.0396717	YES
0.0436886	YES
0.0682407	NO
0.0420077	YES
0.0557975	NO
0.0783578	NO
0.0817726	YES
0.0585929	YES
0.0738376	YES
0.0605661	YES
0.0794649	YES
0.0490928	YES
0.0389986	NO
0.0482641	NO
0.0616512	YES
0.061752	NO
0.0645457	YES
0.0697062	YES
0.0432825	YES
0.0557704	YES
0.0978944	YES
0.0889662	YES
0.0795123	YES
0.0581069	YES
0.0642459	NO
0.0812024	NO
0.0766706	YES
0.078422	YES
0.0510567	YES
0.0787789	YES
0.0727133	YES
0.066097	NO
0.0808183	NO
0.0789704	NO
0.0682215	YES
0.0783381	YES
0.0557933	YES
0.0490586	YES
0.0534528	YES
0.0534479	YES
0.0597431	YES
0.0552074	YES
0.0400112	YES
0.0605266	YES
0.0319497	YES
0.0593249	YES
0.0582624	YES
0.0415037	YES
0.0476332	YES
0.0402856	YES
0.0538251	YES
0.0583809	YES
0.0374265	YES
0.0482268	YES
0.0605713	YES
0.0373799	YES
0.0602476	YES
0.0494534	YES
0.0666707	NO
0.0552339	NO
0.0477334	YES
0.0539777	YES
0.0763724	YES
0.0717604	YES
0.0711548	YES
0.0544309	YES
0.0639484	YES
0.0563197	YES
0.0710477	YES
0.0745051	YES
0.0528159	YES
0.0790111	YES
0.0808815	YES
0.0736579	YES
0.0906776	YES
0.0646789	YES
0.0752793	YES
0.0856839	YES
0.0640494	YES
0.083254	YES
0.0729163	YES
0.0821409	YES
0.092061	YES
0.0487449	NO
0.0458658	NO
0.0669778	NO
0.0677685	NO
0.0499595	YES
0.0695785	YES
0.0524493	YES
0.052949	YES
0.062128	YES
0.0612839	YES
0.0647506	YES
0.0774215	YES
0.0783301	YES
0.0634432	YES
0.0780044	YES
0.0530398	YES
0.0817585	YES
0.080691	YES
0.0746063	YES
0.0817998	YES
0.0694762	YES
0.0887401	YES
0.06507	YES
0.0888063	YES
0.111266	YES
0.0704164	YES
0.0976737	YES
0.0762998	YES
0.0885742	YES
0.0883438	YES
0.0765991	YES
0.0809208	YES
0.0889397	YES
0.0815024	YES
0.0685426	YES
0.0799574	YES
0.0722264	YES
0.0819113	YES
0.067359	YES
0.0778132	YES
0.0766773	YES
0.0645127	YES
0.0840173	YES
0.0508909	YES
0.0696825	YES
0.0593773	YES
0.0925346	YES
0.0920516	YES
0.0622754	YES
0.0796249	YES
0.0744413	YES
0.0742853	YES
0.0676259	YES
0.0732846	YES
0.0645005	YES
0.0721072	YES
0.0512494	YES
0.0562527	YES
0.0560052	YES
0.0524727	YES
0.0549521	YES
0.0753867	YES
0.0562273	YES
0.0672072	YES
0.0458216	YES
0.0656022	YES
0.0603953	YES
0.0713102	YES
0.0689671	YES
0.047693	YES
0.0492508	YES
0.0578936	YES
0.0561751	YES
0.0619744	YES
0.0524242	YES
0.0693748	YES
0.0582383	YES
0.0602857	YES
0.0577529	YES
0.0429685	YES
0.0466304	YES
0.0667029	YES
0.0675316	YES
0.0624084	YES
0.06618	YES
0.0748277	YES
0.0825461	YES
0.0710641	YES
0.0459694	YES
0.0641886	YES
0.0584004	YES
0.0371074	YES
0.0554114	YES
0.0380245	YES
0.0532941	YES
0.0458888	YES
0.0572665	YES
0.0610099	YES
0.0675415	YES
0.0531502	YES
0.0616274	YES
0.057071	YES
0.0565326	YES
0.0694951	YES
0.0494543	YES
0.0637359	YES
0.0550801	YES
0.051075	YES
0.0592543	YES
0.0406499	YES
0.0450779	YES
0.0482471	YES
0.0463154	YES
0.0534523	YES
0.0569703	YES
0.0499654	YES
0.0515579	YES
0.0548758	YES
0.0482176	YES
0.063827	YES
0.0336651	YES
0.0459819	YES
0.0445044	YES
0.0385428	YES
0.0319031	YES
0.0529329	YES
0.0487417	YES
0.0542554	YES
0.0993127	YES
0.0755649	YES
0.0666886	YES
0.0933697	YES
0.0778615	YES
0.053243	YES
0.0750907	YES
0.053493	YES
0.000483568	NO
0.0016735	NO
0.00167868	NO
0.000376228	NO
0.000442653	NO
0.000286732	NO
0.00196541	NO
0.00174067	NO
0.00044699	NO
0.000483568	NO
0.000483568	NO
0.00364859	NO
0.00384	NO
0.00137506	NO
0.00232248	NO
0.00144571	NO
0.00148492	NO
0.00103128	NO
0.000343779	NO
0.00329911	NO
0.00259425	NO
0.00310254	NO
0.00328613	NO
0.000955673	NO
0.00874432	NO
0.000903722	NO
0.00062333	NO
0.00094188	NO
0.000385561	NO
0.00152895	NO
0.00112839	NO
0.00328811	NO
0.00525651	NO
0.0563257	NO
0.0708021	NO
0.0458263	NO
0.0476722	NO
0.0601566	NO
0.0548194	NO
0.0507848	NO
0.0552692	NO
0.0413808	NO
0.0577965	NO
0.070155	NO
0.068456	NO
0.0691959	NO
0.0798024	NO
0.0717332	NO
0.0733515	NO
0.0605083	NO
0.0671303	NO
0.0648952	NO
0.0569241	NO
0.0744649	NO
0.0847786	NO
0.088674	NO
0.0836336	NO
0.0966459	NO
0.0854647	NO
0.0884435	NO
0.104852	NO
0.0699964	NO
0.0671003	NO
0.0693982	NO
0.064682	NO
0.069396	NO
0.0914906	NO
0.094943	NO
0.0837576	NO
0.0870363	NO
0.099022	NO
0.100705	NO
0.0886588	NO
0.0923182	NO
0.0903091	NO
0.0940998	NO
0.0768549	NO
0.0766847	NO
0.0643892	NO
0.0594286	NO
0.0695834	NO
0.0508409	NO
0.0536275	NO
0.0746564	NO
0.071788	NO
0.0692912	NO
0.0613857	NO
0.0880161	NO
0.0388705	NO
0.0573334	NO
0.0728282	NO
0.084628	NO
0.0696198	NO
0.083973	NO
0.054204	NO
0.0529027	NO
0.0674709	NO
0.0988557	NO
0.0616168	NO
0.072119	NO
0.0520412	NO
0.0910534	NO
0.056503	NO
0.0875092	NO
0.0605103	NO
0.0805115	NO
0.0727846	NO
0.0714457	YES
0.0791304	YES
0.0893248	YES
0.046762	NO
0.0743257	NO
0.0706067	NO
0.0667839	NO
0.0701291	YES
0.0659274	YES
0.0677419	YES
0.051208	YES
0.086799	YES
0.045346	NO
0.0616234	YES
0.0578333	YES
0.0598694	YES
0.0335844	NO
0.0567811	NO
0.054136	NO
0.0539469	NO
0.0588839	YES
0.0556051	YES
0.0409881	YES
0.0508443	YES
0.0680412	YES
0.0473089	NO
0.0489069	YES
0.0484279	YES
0.0501742	YES
0.0257277	NO
0.0484838	NO
0.0300205	NO
0.0385452	NO
0.0417897	YES
0.0399943	YES
0.038747	YES
0.0357593	YES
0.0512774	YES
0.0919429	NO
0.076265	NO
0.073874	NO
0.0714466	NO
0.0596927	NO
0.0561909	NO
0.0554846	NO
0.077587	NO
0.0501409	NO
0.0668901	NO
0.0837028	NO
0.0331615	NO
0.0621029	NO
0.0608857	NO
0.0851502	NO
0.0645742	NO
0.0557914	NO
0.0662648	NO
0.0562011	NO
0.053158	NO
0.0530256	NO
0.0557441	NO
0.0400568	NO
0.0666785	NO
0.0460864	NO
0.0574629	NO
0.0480452	NO
0.0469713	NO
0.0628476	NO
0.0773529	NO
0.072841	NO
0.0419215	NO
0.0385975	NO
0.0521291	NO
0.0371172	NO
0.0528437	NO
0.0660147	NO
0.0457324	NO
0.0502449	NO
0.0328189	NO
0.0498727	NO
0.0444759	NO
0.0383464	NO
0.0708988	NO
0.0531907	NO
0.0793548	NO
0.0894555	NO
0.0758385	NO
0.0955316	NO
0.0853252	NO
0.0703748	NO
0.0724675	NO
0.0746974	NO
0.0848862	NO
0.0671379	NO
0.0816489	NO
0.104698	NO
0.0788274	NO
0.0981933	NO
0.125322	NO
0.0654785	NO
0.0366432	NO
0.0574674	NO
0.0731434	NO
0.0594416	NO
0.0480138	NO
0.0536674	NO
0.0461274	NO
0.0423742	NO
0.0389164	NO
0.0592818	NO
0.0711702	NO
0.0497571	NO
0.0502576	NO
0.077129	NO
0.0453219	NO
0.0672932	NO
0.0682093	NO
0.043452	NO
0.0663279	NO
0.0615529	NO
0.078406	NO
0.0629587	NO
0.0341376	NO
0.0491341	NO
0.0500336	NO
0.0490577	NO
0.0501528	NO
0.0537484	NO
0.0665478	NO
0.0732358	NO
0.0627294	NO
0.0692695	NO
0.0782607	NO
0.0816285	NO
0.0874048	NO
0.063691	NO
0.0626303	NO
0.0545018	NO
0.0563323	NO
0.0512437	NO
0.04157	NO
0.0586812	NO
0.0658308	NO
0.0403484	NO
0.0630167	NO
0.0358117	NO
0.0610428	NO
0.0599308	NO
0.0369969	NO
0.0512417	NO
0.0561941	NO
0.0490033	YES
0.0502534	YES
0.0503847	YES
0.0463529	YES
0.0469101	NO
0.0545356	NO
0.0297779	NO
0.0423182	NO
0.0640758	YES
0.0681586	YES
0.0316045	YES
0.0473801	YES
0.030909	YES
0.0608238	NO
0.0417636	YES
0.0457442	YES
0.0553188	YES
0.0686634	YES
0.0602954	NO
0.0673118	NO
0.0356142	NO
0.0498289	NO
0.0373803	YES
0.0748894	YES
0.0431447	YES
0.0543468	YES
0.0306951	YES
0.0754814	NO
0.06075	YES
0.0516155	YES
0.0526386	YES
0.0736344	YES
0.0719525	NO
0.0823301	NO
0.0724319	NO
0.058768	NO
0.0598625	YES
0.0883128	YES
0.050994	YES
0.0673878	YES
0.060765	YES
0.0755013	NO
0.0829328	YES
0.0656406	YES
0.0467528	YES
0.0806222	YES
0.0577522	NO
0.0624414	NO
0.0693145	NO
0.0711012	NO
0.100145	YES
0.0759174	YES
0.0966586	YES
0.0843911	YES
0.103841	YES
0.06461	NO
0.0840147	NO
0.0731046	NO
0.0701514	NO
0.059927	NO
0.0765402	YES
0.0674307	YES
0.0616524	YES
0.060461	NO
0.046538	YES
0.055385	YES
0.057487	YES
0.0550671	NO
0.0653651	YES
0.0833382	YES
0.0904476	YES
0.0642593	NO
0.0581681	YES
0.0814885	YES
0.0842161	YES
0.0499425	NO
0.0952973	NO
0.0764613	NO
0.0700701	NO
0.08759	NO
0.0861367	NO
0.072295	NO
0.0752487	NO
0.0712418	NO
0.0795131	NO
0.0771262	NO
0.0853215	NO
0.0850989	NO
0.0902981	NO
0.0928793	NO
0.0706531	NO
0.0715046	NO
0.077861	NO
0.0569568	NO
0.0568657	NO
0.0623873	NO
0.0815923	YES
0.0757392	YES
0.0936717	NO
0.0658331	NO
0.0744123	NO
0.0832517	NO
0.0609075	NO
0.0591274	NO
0.0494382	YES
0.0986556	NO
0.0766324	NO
0.0622092	NO
0.0754959	NO
0.0885634	NO
0.0621493	NO
0.0609947	NO
0.0657039	NO
0.0513709	NO
0.056019	NO
0.0454757	NO
0.0463752	NO
0.0765231	NO
0.0940446	NO
0.069986	NO
0.0709807	NO
0.0930172	NO
0.0884962	NO
0.0610335	YES
0.0789713	YES
0.0636371	YES
0.0496791	YES
0.0747494	NO
0.0650308	NO
0.0758984	NO
0.0742545	NO
0.0575689	YES
0.050955	YES
0.0510563	YES
0.0655766	NO
0.0552526	NO
0.0548449	NO
0.0464829	NO
0.0641568	NO
0.0656406	YES
0.0664302	YES
0.0659547	YES
0.0400963	NO
0.0729869	YES
0.0623065	NO
0.0518268	NO
0.0448337	NO
0.0517142	NO
0.0607127	YES
0.0582182	YES
0.0486616	YES
0.0635992	NO
0.0603481	YES
0.0901993	NO
0.0730458	NO
0.0702256	NO
0.0606868	NO
0.0879936	YES
0.0848177	YES
0.0829957	YES
0.0530975	NO
0.0573601	YES
0.0817333	NO
0.0645395	NO
0.0761658	NO
0.071015	NO
0.0531575	YES
0.0505812	YES
0.0600325	YES
0.042348	NO
0.0663833	NO
0.0649394	NO
0.061002	NO
0.0478538	NO
0.0456567	YES
0.0466936	YES
0.0577408	YES
0.0542311	NO
0.0672178	NO
0.048998	NO
0.0552769	NO
0.0626793	NO
0.0712093	YES
0.0464624	YES
0.0594257	YES
0.047696	NO
0.0706172	NO
0.0688347	NO
0.0542186	NO
0.0503319	NO
0.0681795	YES
0.0618757	YES
0.0646098	YES
0.0428162	NO
0.0618156	NO
0.0650846	NO
0.0596083	NO
0.0624395	NO
0.0848307	NO
0.0821137	NO
0.0674318	NO
0.0660447	NO
0.0844994	NO
0.0742913	NO
0.0406015	NO
0.0554254	NO
0.0539967	NO
0.0604827	YES
0.042133	YES
0.0561331	YES
0.0373103	NO
0.0476619	YES
0.0754838	NO
0.0452972	NO
0.0645716	NO
0.0574367	NO
0.0528034	YES
0.0529195	YES
0.0528055	YES
0.056563	NO
0.0812871	YES
0.0520158	NO
0.0480685	NO
0.0602528	NO
0.0440313	NO
0.0567973	YES
0.0299971	YES
0.0490049	YES
0.0406294	NO
0.047609	YES
0.0628603	NO
0.0677351	NO
0.0692975	NO
0.0896427	NO
0.0619332	NO
0.0494974	NO
0.0561866	NO
0.0466284	NO
0.0667377	NO
0.0597797	NO
0.0637222	NO
0.0450342	NO
0.0579436	NO
0.0401441	NO
0.0602008	NO
0.0339152	NO
0.0772485	NO
0.0651543	NO
0.0828329	NO
0.0621662	NO
0.0536338	NO
0.0309767	NO
0.0605275	NO
0.0711636	NO
0.0601086	NO
0.0718885	NO
0.0622326	NO
0.0585222	NO
0.0676272	NO
0.0426398	NO
0.0521557	NO
0.0502406	NO
0.0536365	YES
0.0613623	YES
0.0481792	YES
0.0686837	YES
0.0694305	YES
0.0591249	YES
0.0753437	NO
0.0603352	YES
0.0664897	YES
0.0750288	YES
0.0734357	YES
0.071613	YES
0.0755145	YES
0.0488556	NO
0.0494668	NO
0.0613496	NO
0.0341051	NO
0.0454039	NO
0.0671629	NO
0.0798451	NO
0.0610467	NO
0.061518	NO
0.0623379	NO
0.0515345	NO
0.0546654	NO
0.0465734	NO
0.05974	NO
0.0713108	NO
0.072542	NO
0.103709	NO
0.0691302	NO
0.0750188	NO
0.0893724	NO
0.0810031	NO
0.0593197	YES
0.0675661	YES
0.059476	YES
[truncated: 4,343 more rows]

[truncated: 3 more sheets: SAMAFS Second cousin IBD frac, SAMAFS Half-sib seg numbers, SAMAFS Full sib seg merge]
